# Supplementary material for: Enzymatic cascades for the stereo-complementary epimerisation of in situ generated epoxy alcohols
Source: Royal Society of Chemistry journal article supplement (doi:10.1039/c7ob00015d), 2017-01-01

## Supporting Information

### Enzymatic cascades for the stereo-complementary epimerisation of *in situ* generated epoxy alcohols

Yu-Chang Liu,<sup>‡a,b,c</sup> Chao Guo,<sup>‡a,b,c</sup> Yan Liu,<sup>a, b</sup> Hai-Bo Wang<sup>a, b</sup> and Zhong-Liu Wu<sup>\*a,b</sup>

<sup>a</sup> Key Laboratory of Environmental and Applied Microbiology, Chengdu Institute of Biology, Chinese Academy of Sciences, Chengdu 610041, China.

E-mail: [wuzhl@cib.ac.cn](mailto:wuzhl@cib.ac.cn); Tel: +86 28-82890434

<sup>b</sup> Environmental Microbiology Key Laboratory of Sichuan Province, Chengdu 610041, China

<sup>c</sup> Graduate University of the Chinese Academy of Sciences, Beijing 100049, China

‡ Both authors contribute equally to this work.

|                                                                             |    |
|-----------------------------------------------------------------------------|----|
| Table S1. Construction of plasmids in this work .....                       | 2  |
| Table S2. Sequences of oligonucleotides used in this work .....             | 2  |
| Table S3. Separation conditions for chiral HPLC analysis <sup>a</sup> ..... | 3  |
| Chiral HPLC chromatograms .....                                             | 4  |
| NMR spectra of products .....                                               | 23 |

**Table S1. Construction of plasmids in this work**

| Constructed plasmid | Vector     | Target enzyme   | Primer set       |                    |
|---------------------|------------|-----------------|------------------|--------------------|
|                     |            |                 | Forward          | Reverse            |
| pET(AB)             | pET15b     | SMO             | <i>Nde</i> I_AB  | <i>Xho</i> I_AB    |
| pET(RE)             | pET15b     | READH           | <i>Nde</i> I_RE  | <i>Xho</i> I_RE    |
| pET(LK)             | pET15b     | LKADH           | <i>Nde</i> I_LK  | <i>Xho</i> I_LK    |
| pRSFD(LKAB)         | pRSFDuet-1 | LKADH           | <i>EcoR</i> I_LK | <i>Hind</i> III_LK |
|                     |            | SMO             | <i>Nde</i> I_AB  | <i>Xho</i> I_AB    |
| pRSFD(REAB)         | pRSFDuet-1 | READH           | <i>EcoR</i> I_RE | <i>Hind</i> III_RE |
|                     |            | SMO             | <i>Nde</i> I_AB  | <i>Xho</i> I_AB    |
| pRSFD(RELK)         | pRSFDuet-1 | READH           | <i>EcoR</i> I_RE | <i>Hind</i> III_RE |
|                     |            | LKADH           | <i>Nde</i> I_LK  | <i>Xho</i> I_LK    |
| pRSFD(LKRE)         | pRSFDuet-1 | LKADH           | <i>EcoR</i> I_LK | <i>Hind</i> III_LK |
|                     |            | READH           | <i>Nde</i> I_RE  | <i>Xho</i> I_RE    |
| pRSFD(PFC05)        | pRSFDuet-1 | PFADH           | <i>EcoR</i> I_PF | <i>Hind</i> III_PF |
|                     |            | <i>ChKRED05</i> | <i>Nde</i> I_C05 | <i>Xho</i> I_C05   |

**Table S2. Sequences of oligonucleotides used in this work**

| Primer             | Sequence                                         |
|--------------------|--------------------------------------------------|
| <i>EcoR</i> I_RE   | CCGGAATTTCGATGAAGGCAATCCAGTACACGAG               |
| <i>Hind</i> III_RE | CCCAAGCTTCTACAGACCAGGGACCACAAC                   |
| <i>Nde</i> I_AB    | CGCCATATGATGAAAAAGCGTATCGGTATTGTTGGT             |
| <i>Xho</i> I_AB    | CCGCTCGAGTTAATTCAGGGGCAGCGGATTG                  |
| <i>Nde</i> I_LK    | CGCCATATGATGACTGATCGTTTTAAAAGGCAAAGTAGCAATTG     |
| <i>Xho</i> I_LK    | CCGCTCGAGTTATTGAGCAGTGTATCCACCATCGACAACGAACTCTG  |
| <i>EcoR</i> I_LK   | CCGGAATTTCGATGACTGATCGTTTTAAAAGGCAAAGTAGCAATTG   |
| <i>Hind</i> III_LK | CCCAAGCTTTTTATTGAGCAGTGTATCCACCATCGACAACGAACTCTG |
| <i>Nde</i> I_RE    | CGCCATATGATGAAGGCAATCCAGTACACGAG                 |
| <i>Xho</i> I_RE    | CCGCTCGAGCTACAGACCAGGGACCACAAC                   |
| <i>EcoR</i> I_PF   | CCGGAATTTCGATGAGCTATAACTTCCATAAT                 |
| <i>Hind</i> III_PF | CCCAAGCTTACTGCGCGGTATAGCCGCCATCCACCGGCAAG        |
| <i>Nde</i> I_C05   | CGCCATATGATGAATATCAACGGAAAAAATGC                 |
| <i>Xho</i> I_C05   | CCGCTCGAGTTAAGGATTTGTAGAGAAAATTG                 |

**Table S3. Separation conditions for chiral HPLC analysis<sup>a</sup>**

| Entry | Substrate  | Column | Column temperature (°C) | Hexane/2-propanol | Flow rate (mL/min) |
|-------|------------|--------|-------------------------|-------------------|--------------------|
| 1     | <b>1a</b>  | AD-H   | 35                      | 90/10             | 0.5                |
| 2     | <b>2a</b>  | AD-H   | 35                      | 95/5              | 0.5                |
| 3     | <b>3a</b>  | AS-H   | 35                      | 90/10             | 0.5                |
| 4     | <b>4a</b>  | AS-H   | 25                      | 98/2              | 0.5                |
| 5     | <b>5a</b>  | AS-H   | 35                      | 95/5              | 0.5                |
| 6     | <b>6a</b>  | AD-H   | 35                      | 90/10             | 0.5                |
| 7     | <b>7a</b>  | AD-H   | 35                      | 90/10             | 0.5                |
| 8     | <b>8a</b>  | AS-H   | 35                      | 95/5              | 0.5                |
| 9     | <b>9a</b>  | AS-H   | 35                      | 95/5              | 0.5                |
| 10    | <b>10a</b> | AS-H   | 35                      | 95/5              | 0.5                |
| 11    | <b>11a</b> | AD-H   | 35                      | 95/5              | 0.5                |
| 12    | <b>12a</b> | AD-H   | 35                      | 90/10             | 0.5                |

<sup>a</sup> All the products and by-products derived from the same substrate were analyzed under the same conditions. The analysis was conducted with a Shimadzu Prominence LC-20AD system connected to a PDA-detector.

## **Chiral HPLC chromatograms**

Shown are chromatograms detected at 220 nm using a photo diode array (PDA) detector.

Chiral HPLC analysis for **1b** production (top to bottom):  
 Standard sample of (*rac*)-**1b**; products of the (*2R*)- and (*2S*)-system

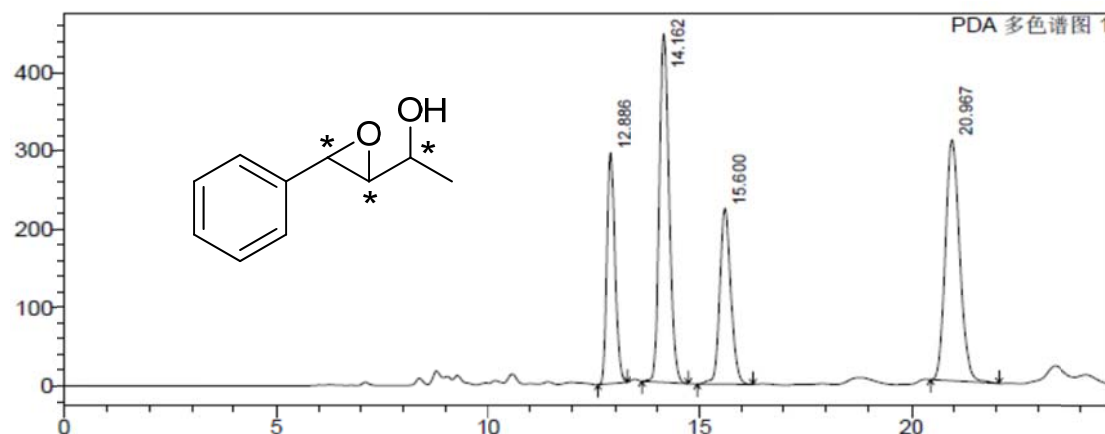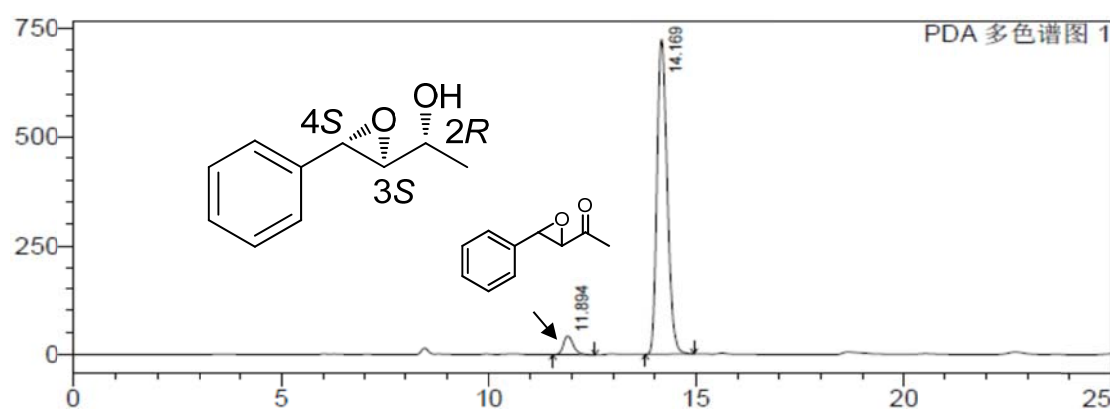

| Peak# | Ret. Time | Area     | Height | Area %  | Height % |
|-------|-----------|----------|--------|---------|----------|
| 1     | 11.894    | 690974   | 41839  | 5.307   | 5.465    |
| 2     | 14.169    | 12329584 | 723804 | 94.693  | 94.535   |
| 总计    |           | 13020557 | 765643 | 100.000 | 100.000  |

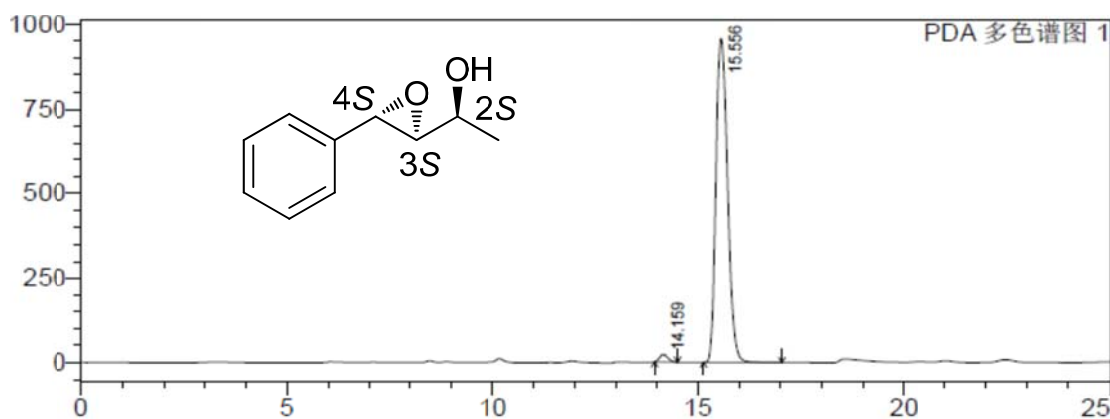

| Peak# | Ret. Time | Area     | Height | Area %  | Height % |
|-------|-----------|----------|--------|---------|----------|
| 1     | 14.159    | 305087   | 21024  | 1.605   | 2.151    |
| 2     | 15.556    | 18708984 | 956613 | 98.395  | 97.849   |
| 总计    |           | 19014071 | 977637 | 100.000 | 100.000  |

Standard sample of (*rac*)-1c

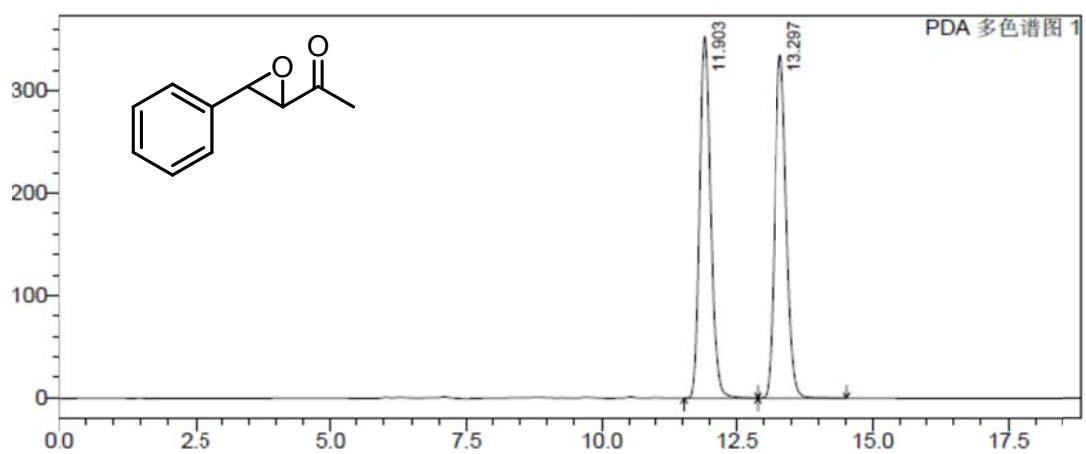

Chiral HPLC analysis for **2b** production (2nd of two attempts) (top to bottom):  
 Standard samples of (*rac*)-**2b**; products of the (*2R*)- and (*2S*)-system

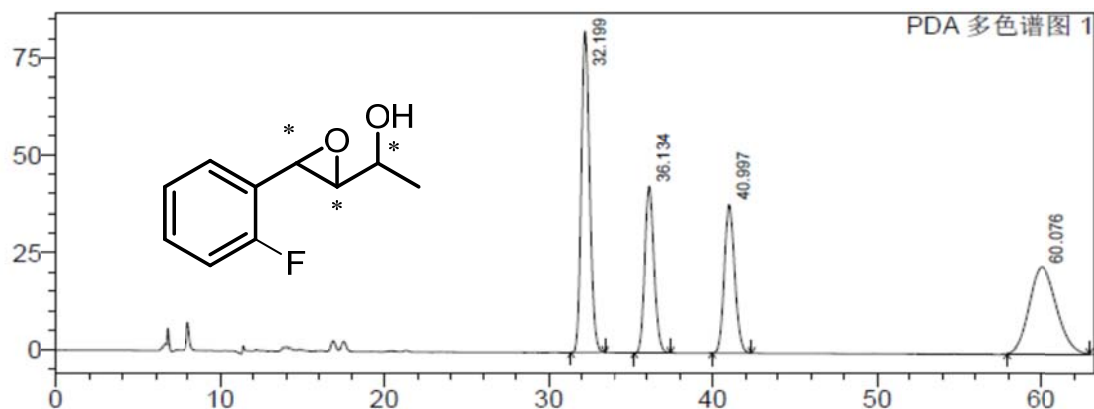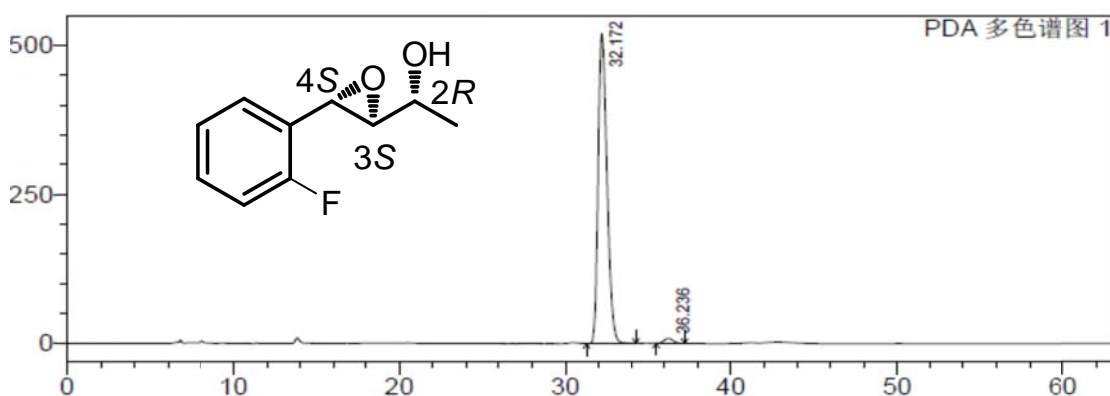

| Peak# | Ret. Time | Area     | Height | Area %  | Height % |
|-------|-----------|----------|--------|---------|----------|
| 1     | 32.172    | 19195815 | 520253 | 98.333  | 98.416   |
| 2     | 36.236    | 325448   | 8373   | 1.667   | 1.584    |
| 总计    |           | 19521263 | 528625 | 100.000 | 100.000  |

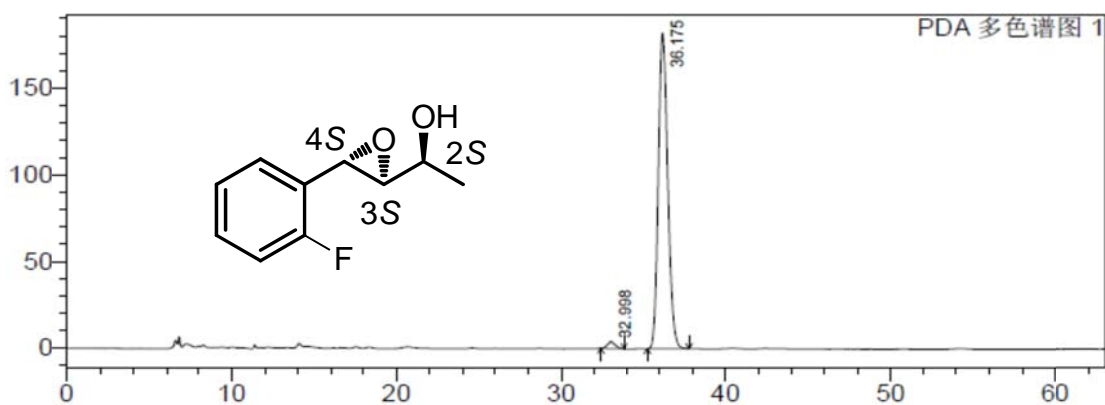

| Peak# | Ret. Time | Area    | Height | Area %  | Height % |
|-------|-----------|---------|--------|---------|----------|
| 1     | 32.998    | 126714  | 3554   | 1.731   | 1.917    |
| 2     | 36.175    | 7193268 | 181879 | 98.269  | 98.083   |
| 总计    |           | 7319982 | 185433 | 100.000 | 100.000  |

Chiral HPLC analysis for **3b** production (top to bottom):

Standard samples of (*rac*)-**3b**; products of the (*2R*)- and (*2S*)-system

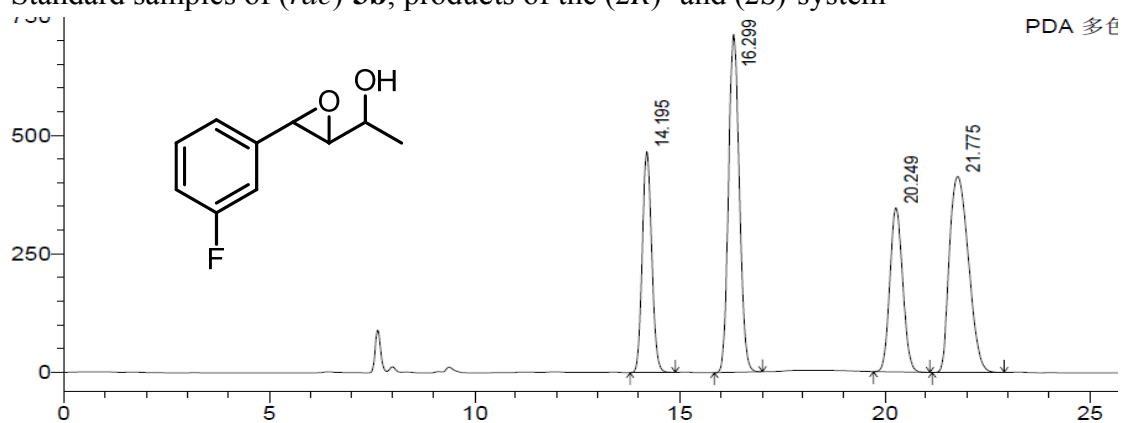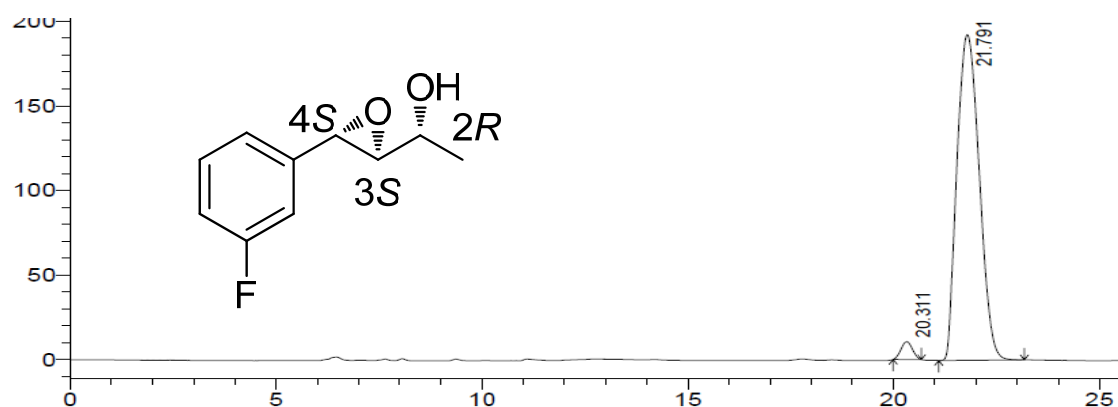

| Peak# | Ret. Time | Area    | Height | Area %  | Height % |
|-------|-----------|---------|--------|---------|----------|
| 1     | 20.311    | 203371  | 10536  | 2.757   | 5.193    |
| 2     | 21.791    | 7173724 | 192350 | 97.243  | 94.807   |
| 总计    |           | 7377095 | 202886 | 100.000 | 100.000  |

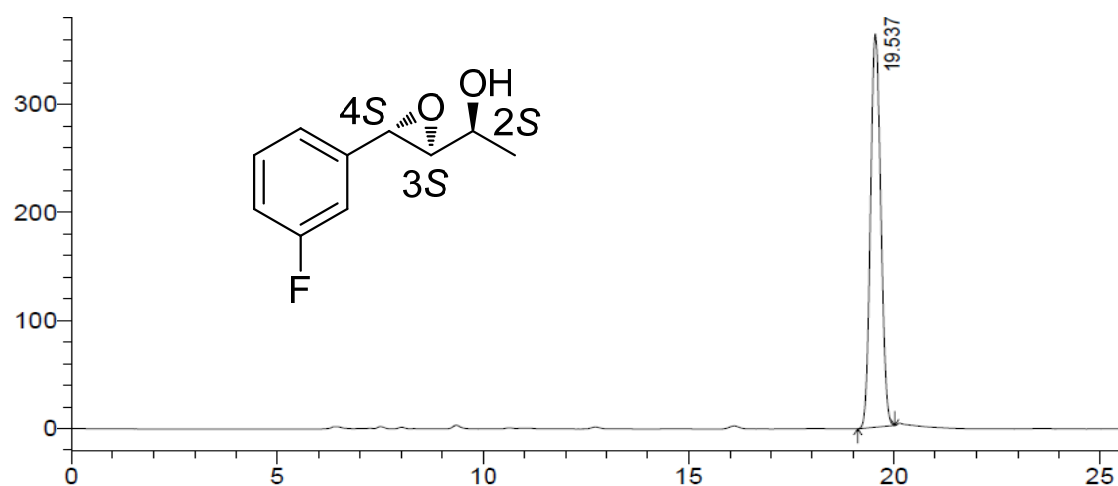

| Peak# | Ret. Time | Area    | Height | Area %  | Height % |
|-------|-----------|---------|--------|---------|----------|
| 1     | 19.537    | 6326853 | 364211 | 100.000 | 100.000  |
| 总计    |           | 6326853 | 364211 | 100.000 | 100.000  |



Chiral HPLC analysis for **4b** production (top to bottom):

Standard samples of (*rac*)-**4b**; products of the (*2R*)- and (*2S*)-system

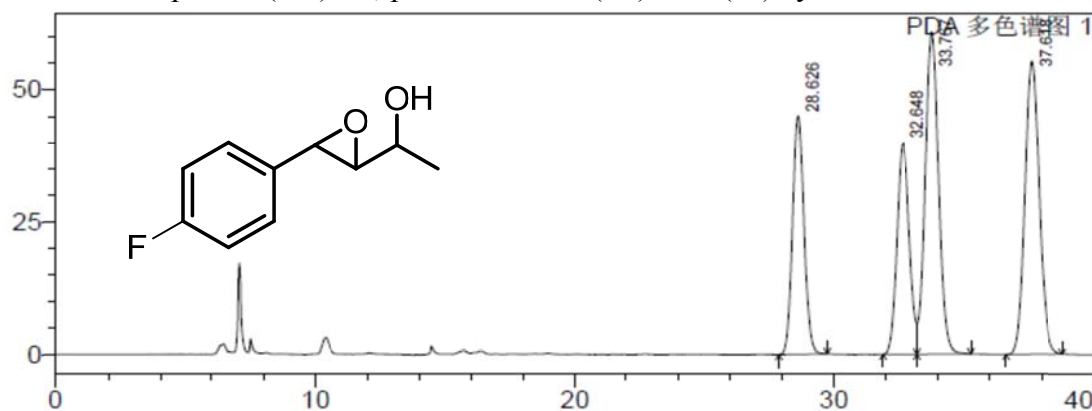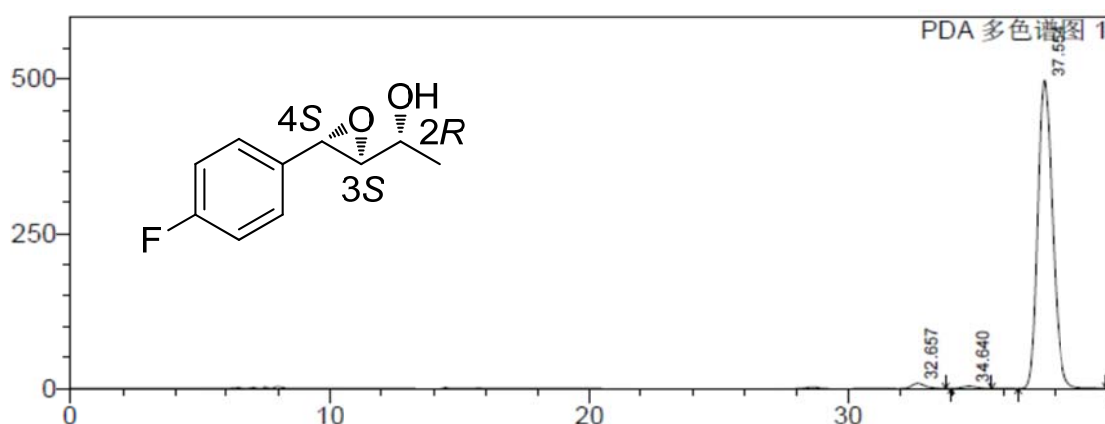

| Peak# | Ret. Time | Area     | Height | Area %  | Height % |
|-------|-----------|----------|--------|---------|----------|
| 1     | 32.657    | 319985   | 8547   | 1.557   | 1.674    |
| 2     | 34.640    | 143160   | 3801   | 0.697   | 0.745    |
| 3     | 37.554    | 20086240 | 498165 | 97.746  | 97.581   |
| 总计    |           | 20549385 | 510513 | 100.000 | 100.000  |

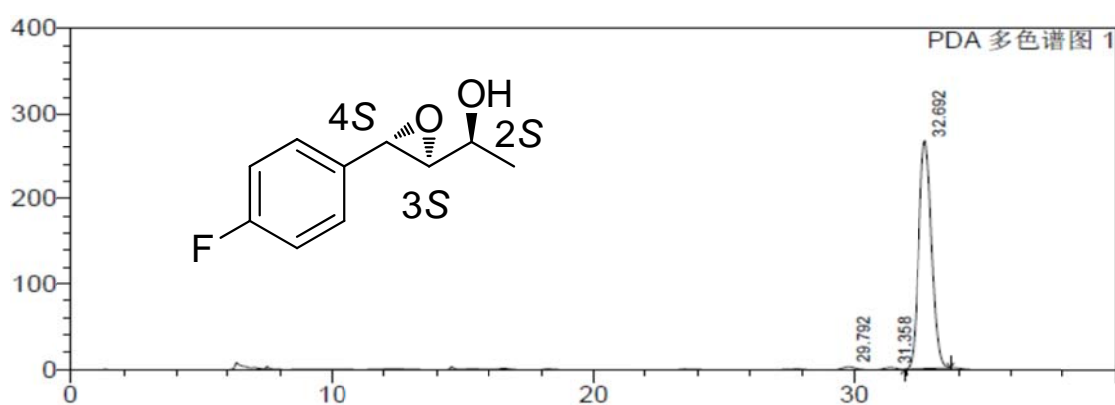

| Peak# | Ret. Time | Area    | Height | Area %  | Height % |
|-------|-----------|---------|--------|---------|----------|
| 1     | 29.792    | 109244  | 3407   | 1.157   | 1.244    |
| 2     | 31.358    | 71284   | 2386   | 0.755   | 0.871    |
| 3     | 32.692    | 9262151 | 268074 | 98.088  | 97.885   |
| 总计    |           | 9442680 | 273866 | 100.000 | 100.000  |

Chiral HPLC analysis for **5b** production (top to bottom):  
 Standard samples of (*rac*)-**5b**; products of the (*2R*)- and (*2S*)-system

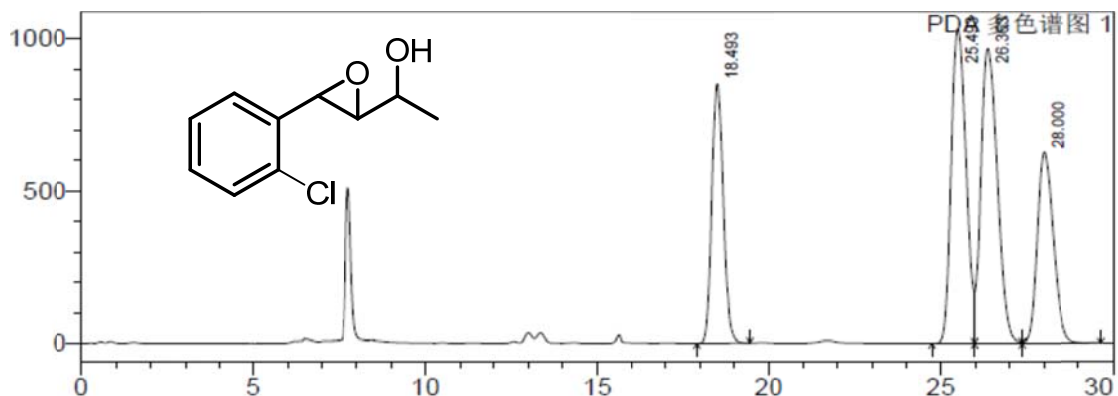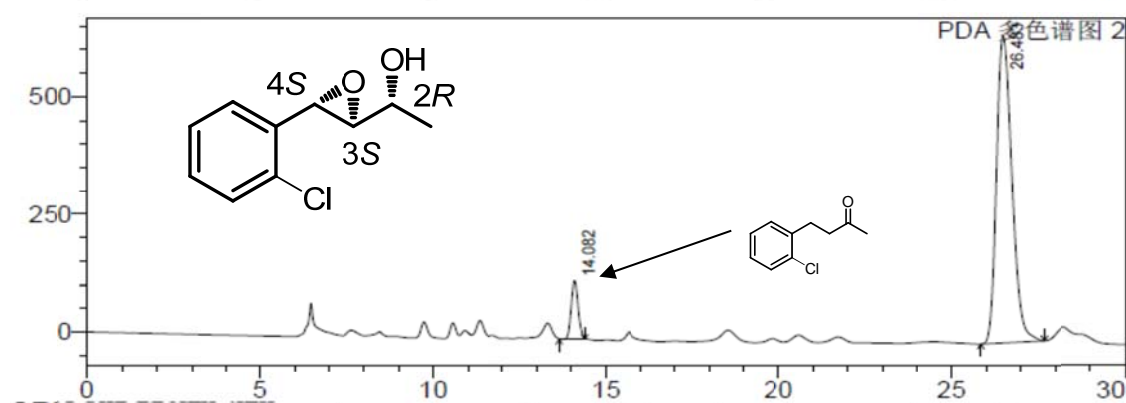

| Peak# | Ret. Time | Area     | Height | Area %  | Height % |
|-------|-----------|----------|--------|---------|----------|
| 1     | 14.082    | 1746002  | 123910 | 7.961   | 15.947   |
| 2     | 26.483    | 20186550 | 653111 | 92.039  | 84.053   |
| 总计    |           | 21932552 | 777021 | 100.000 | 100.000  |

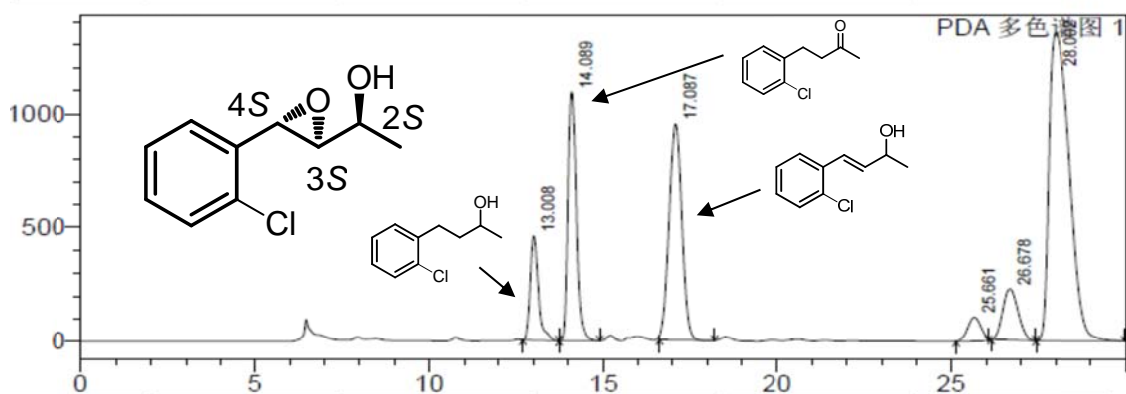

| Peak# | Ret. Time | Area      | Height  | Area %  | Height % |
|-------|-----------|-----------|---------|---------|----------|
| 1     | 13.008    | 7487143   | 456852  | 6.544   | 10.932   |
| 2     | 14.089    | 18434091  | 1091307 | 16.113  | 26.114   |
| 3     | 17.087    | 24149949  | 949039  | 21.109  | 22.709   |
| 4     | 25.661    | 2833479   | 105382  | 2.477   | 2.522    |
| 5     | 26.678    | 6887867   | 225473  | 6.021   | 5.395    |
| 6     | 28.002    | 54611284  | 1351017 | 47.736  | 32.328   |
| 总计    |           | 114403814 | 4179071 | 100.000 | 100.000  |

Standard samples of (*rac*)-**5a**, **5e** and (*rac*)-**5f**;

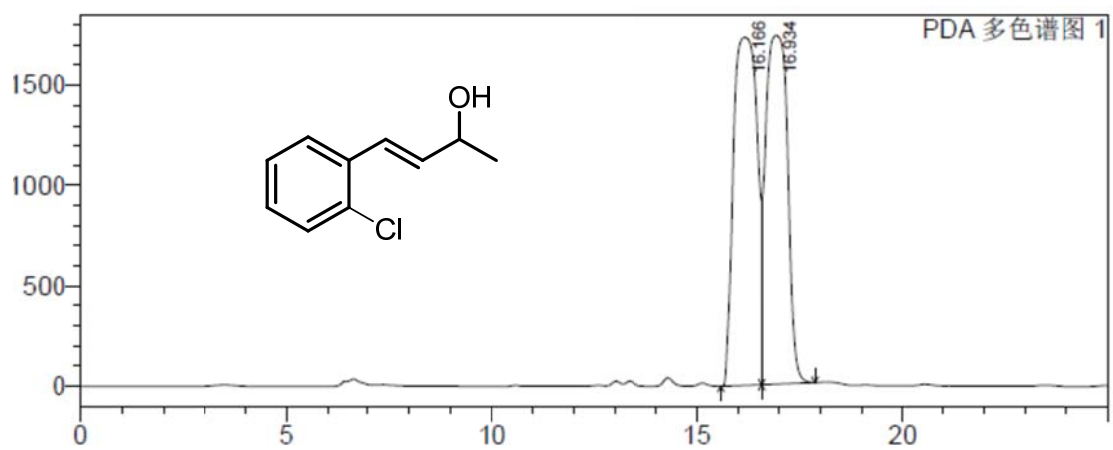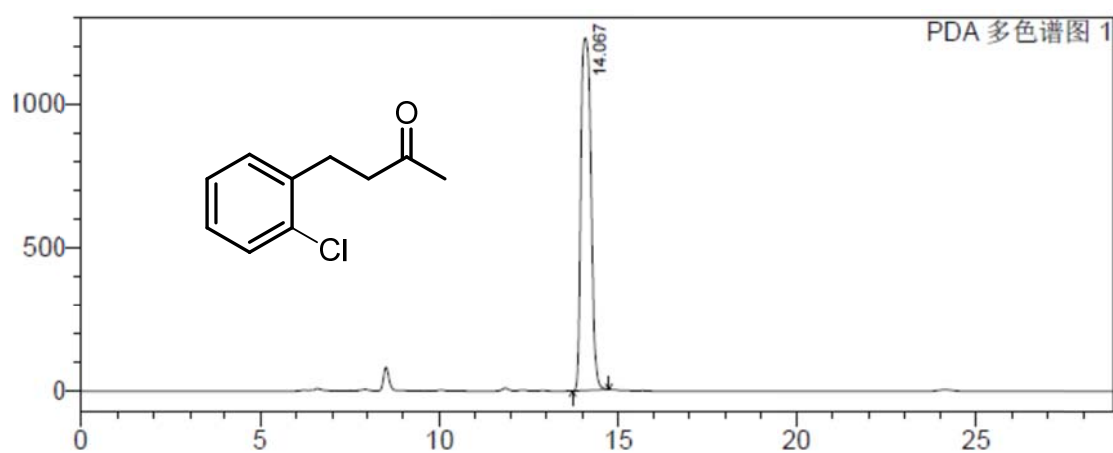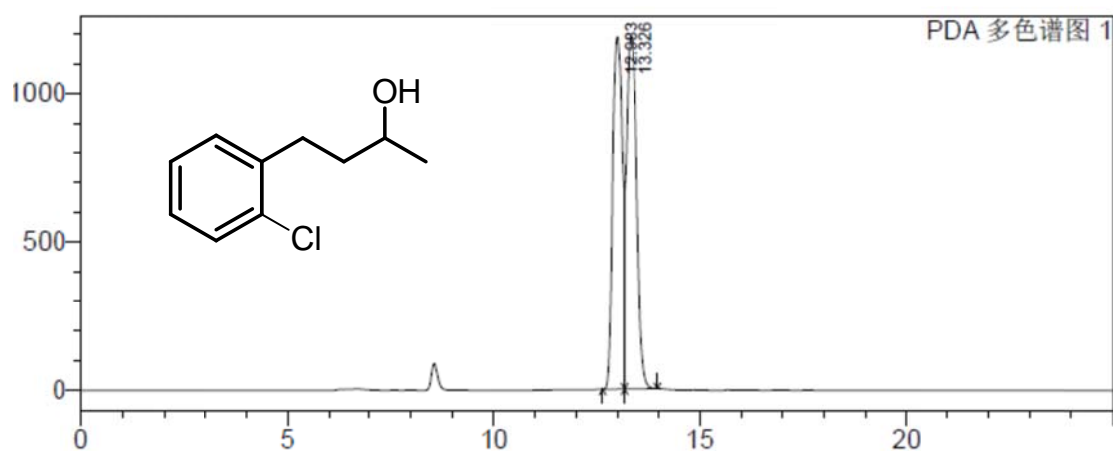

Chiral HPLC analysis for **6b** production (top to bottom):

Standard samples of (*rac*)-**6b**; products of the (*2R*)- and (*2S*)-system

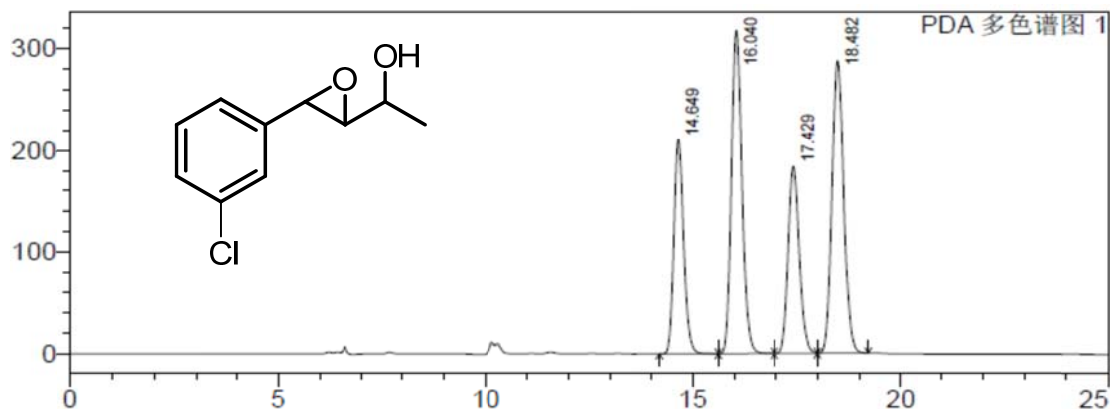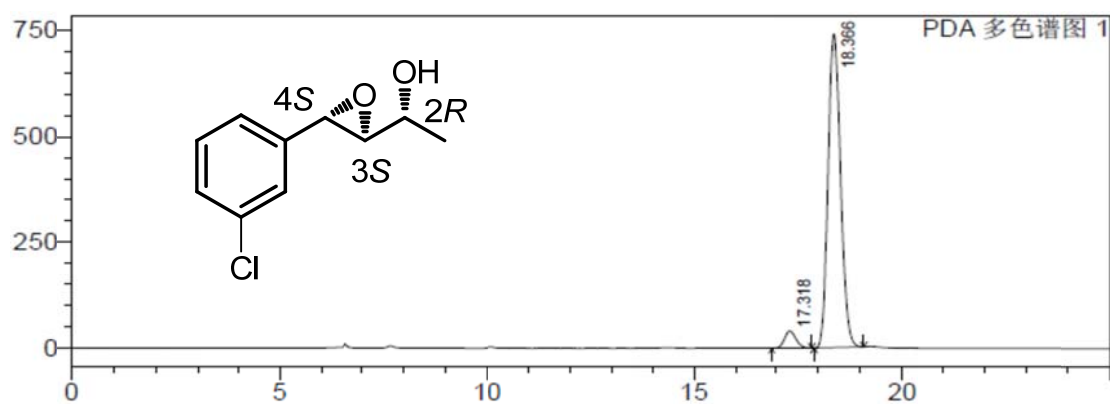

| Peak# | Ret. Time | Area     | Height | Area %  | Height % |
|-------|-----------|----------|--------|---------|----------|
| 1     | 17.318    | 755309   | 40263  | 4.682   | 5.160    |
| 2     | 18.366    | 15376914 | 740017 | 95.318  | 94.840   |
| 总计    |           | 16132222 | 780280 | 100.000 | 100.000  |

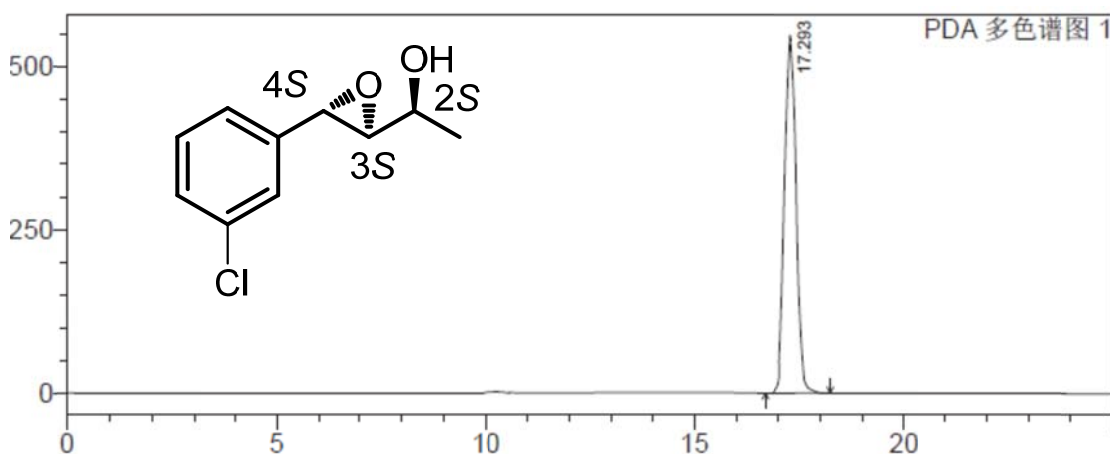

| Peak# | Ret. Time | Area     | Height | Area %  | Height % |
|-------|-----------|----------|--------|---------|----------|
| 1     | 17.293    | 10522178 | 547646 | 100.000 | 100.000  |
| 总计    |           | 10522178 | 547646 | 100.000 | 100.000  |

Chiral HPLC analysis for **7b** production (top to bottom):

Standard samples of (*rac*)-**7b**; products of the (*2R*)- and (*2S*)-system

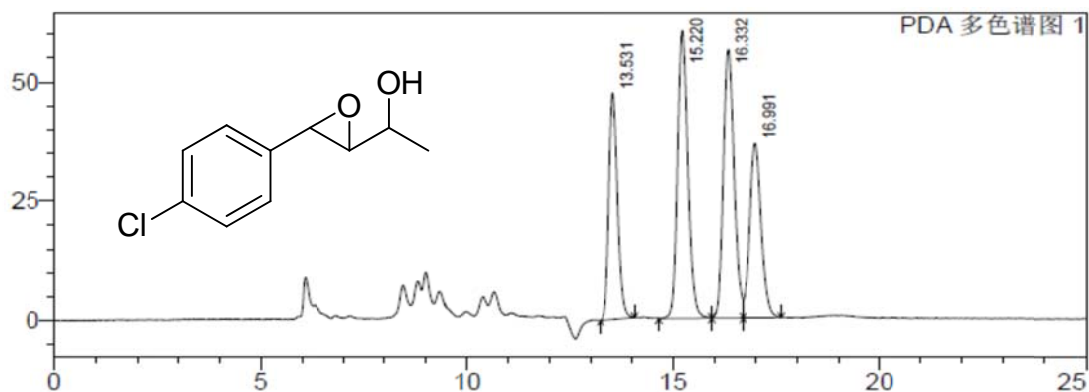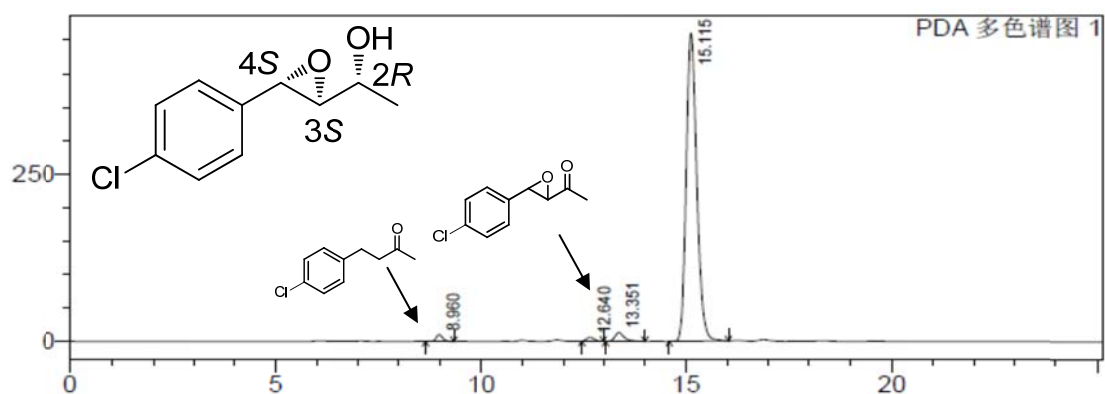

| Peak# | Ret. Time | Area    | Height | Area %  | Height % |
|-------|-----------|---------|--------|---------|----------|
| 1     | 8.960     | 107692  | 10046  | 1.254   | 2.053    |
| 2     | 12.640    | 76225   | 5751   | 0.887   | 1.175    |
| 3     | 13.351    | 227044  | 13566  | 2.643   | 2.773    |
| 4     | 15.115    | 8178675 | 459868 | 95.216  | 93.998   |
| 总计    |           | 8589636 | 489230 | 100.000 | 100.000  |

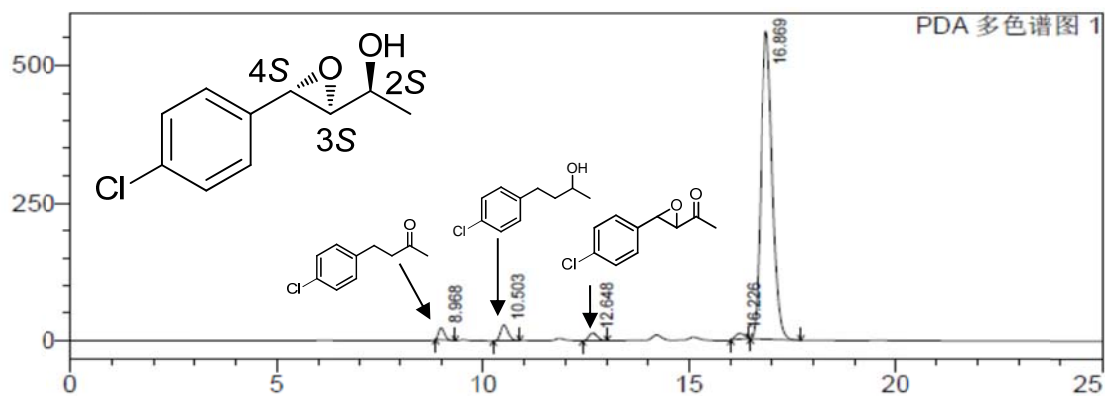

| Peak# | Ret. Time | Area     | Height | Area %  | Height % |
|-------|-----------|----------|--------|---------|----------|
| 1     | 8.968     | 209454   | 21503  | 1.773   | 3.391    |
| 2     | 10.503    | 357525   | 28155  | 3.027   | 4.440    |
| 3     | 12.648    | 193739   | 14126  | 1.640   | 2.228    |
| 4     | 16.226    | 154922   | 10810  | 1.312   | 1.705    |
| 5     | 16.869    | 10894958 | 559534 | 92.247  | 88.237   |
| 总计    |           | 11810598 | 634128 | 100.000 | 100.000  |

Standard samples of (*rac*)-**7c**, **7e** and (*rac*)-**7f**;

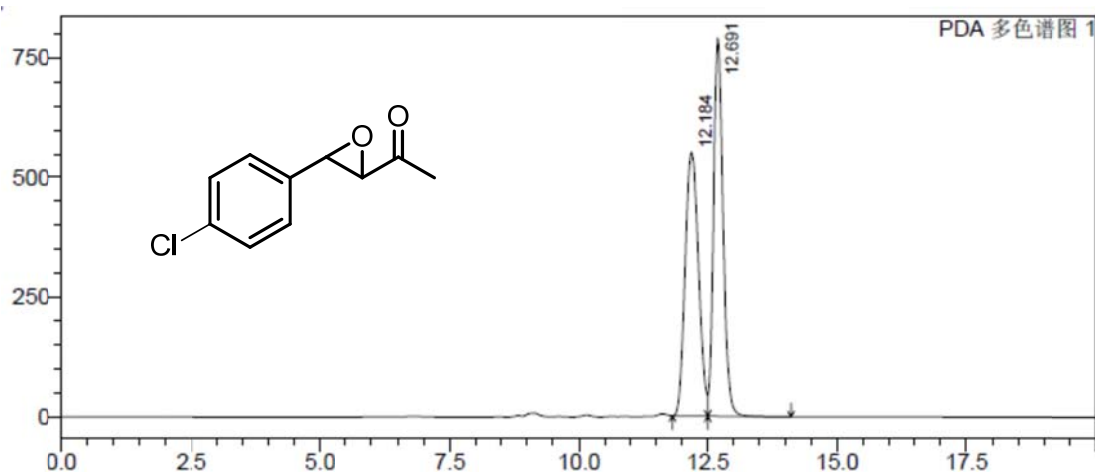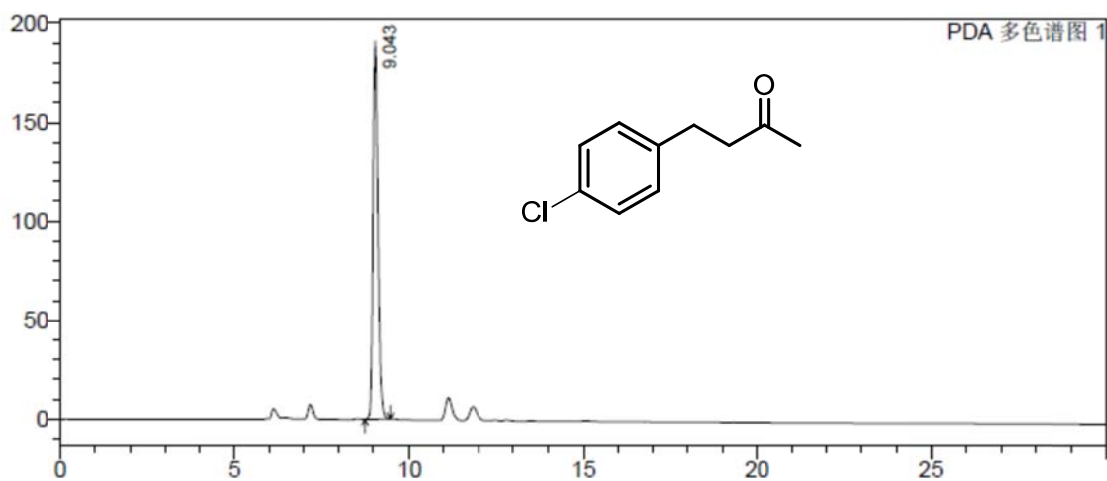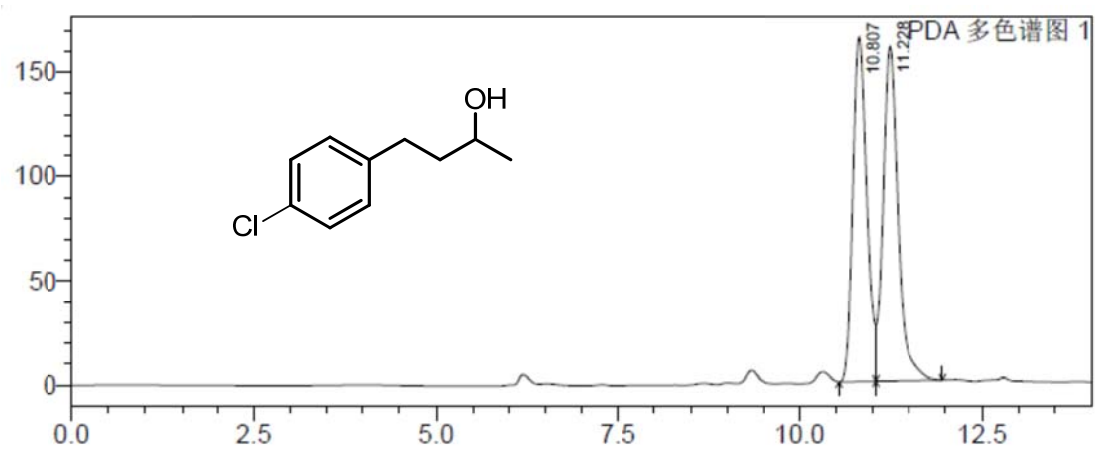

Chiral HPLC analysis for **8b** production (top to bottom):

Standard samples of (*rac*)-**8b**; products of the (*2R*)- and (*2S*)-system

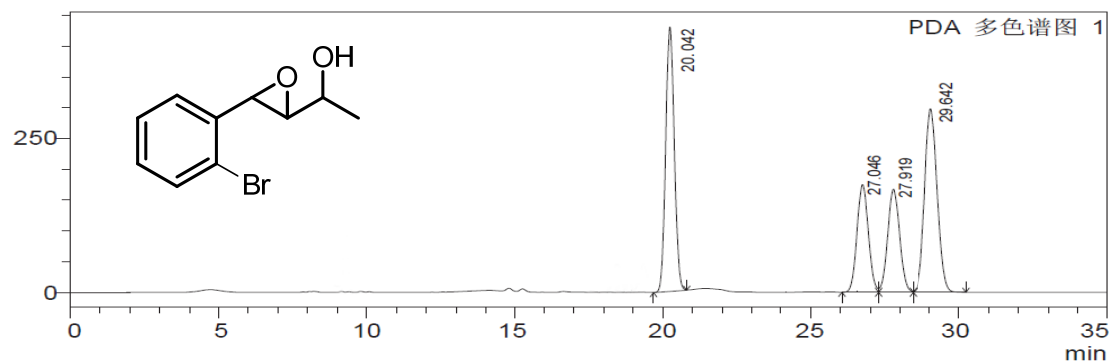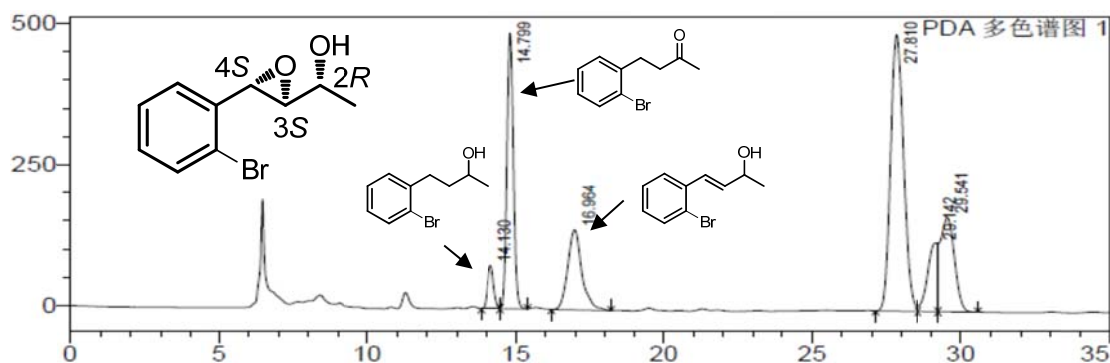

| Peak# | Ret. Time | Area     | Height  | Area %  | Height % |
|-------|-----------|----------|---------|---------|----------|
| 1     | 14.130    | 1146070  | 76485   | 3.163   | 5.162    |
| 2     | 14.799    | 7340260  | 488024  | 20.260  | 32.938   |
| 3     | 16.964    | 4652307  | 141279  | 12.841  | 9.535    |
| 4     | 27.810    | 14794767 | 489021  | 40.835  | 33.006   |
| 5     | 29.142    | 2795985  | 120800  | 7.717   | 8.153    |
| 6     | 29.541    | 5501184  | 166016  | 15.184  | 11.205   |
| 总计    |           | 36230574 | 1481625 | 100.000 | 100.000  |

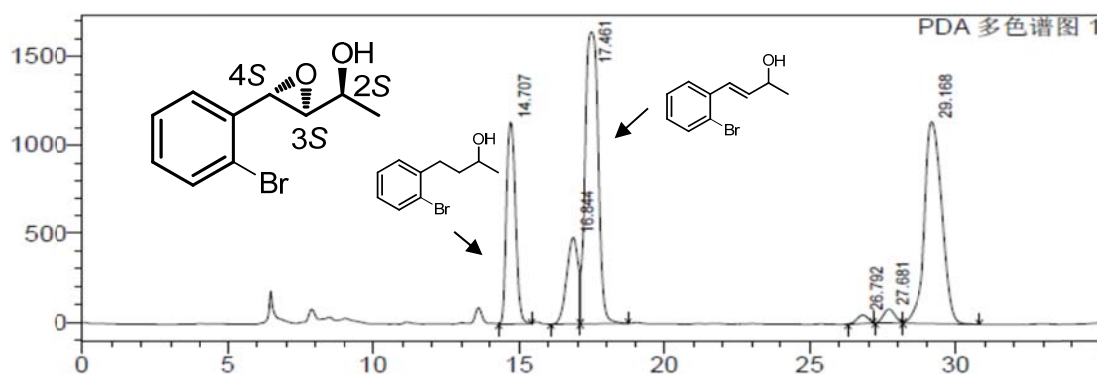

| Peak# | Ret. Time | Area      | Height  | Area %  | Height % |
|-------|-----------|-----------|---------|---------|----------|
| 1     | 14.707    | 24573445  | 1141415 | 17.593  | 25.152   |
| 2     | 16.844    | 13137455  | 483994  | 9.405   | 10.665   |
| 3     | 17.461    | 51103947  | 1644680 | 36.586  | 36.242   |
| 4     | 26.792    | 1258890   | 48506   | 0.901   | 1.069    |
| 5     | 27.681    | 2108345   | 78579   | 1.509   | 1.732    |
| 6     | 29.168    | 47498743  | 1140874 | 34.005  | 25.140   |
| 总计    |           | 139680825 | 4538049 | 100.000 | 100.000  |

Standard samples of (*rac*)-**8c**, **8e** and (*rac*)-**8f**;

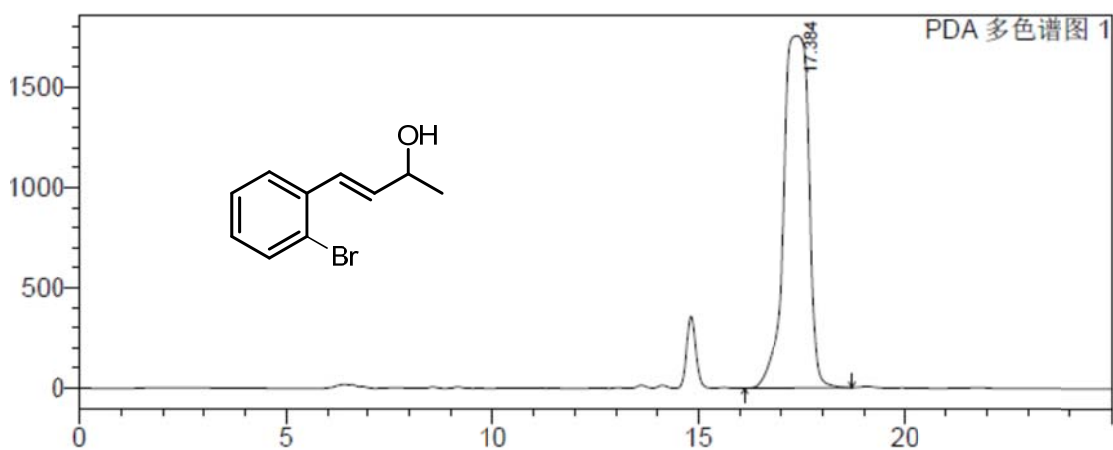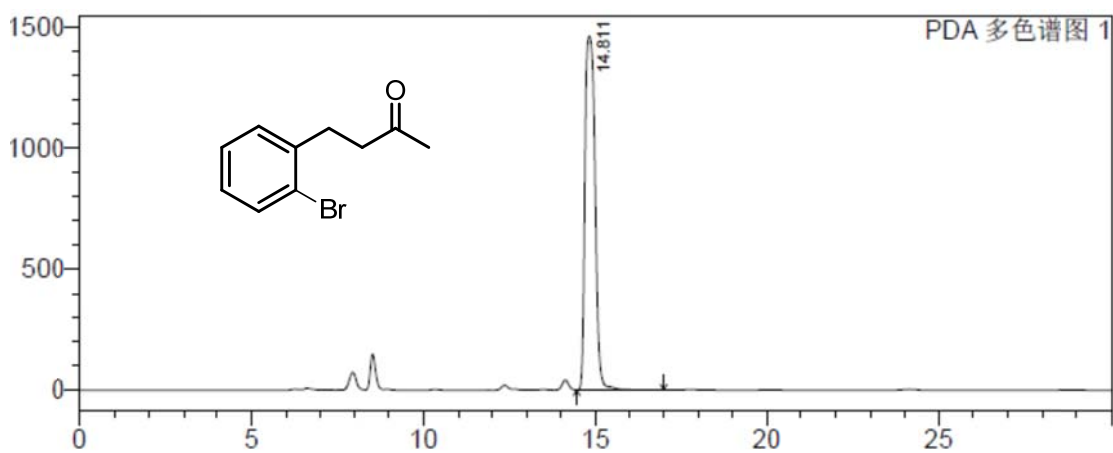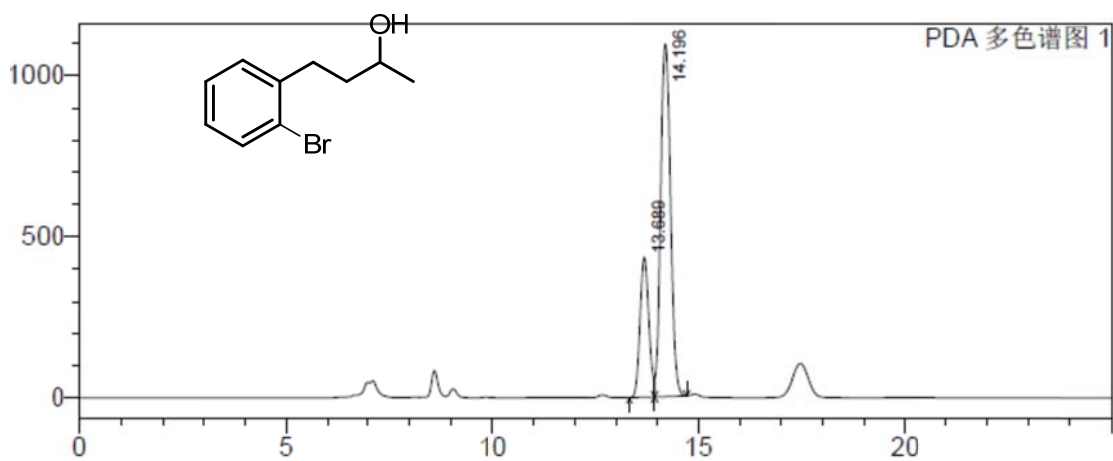



Chiral HPLC analysis for **9b** production (top to bottom):

Standard samples of (*rac*)-**9b**; products of the (*2R*)- and (*2S*)-system

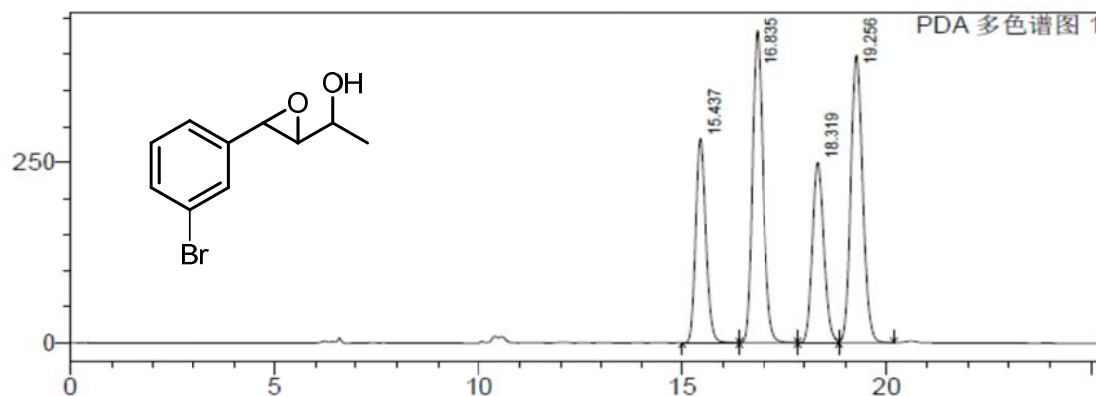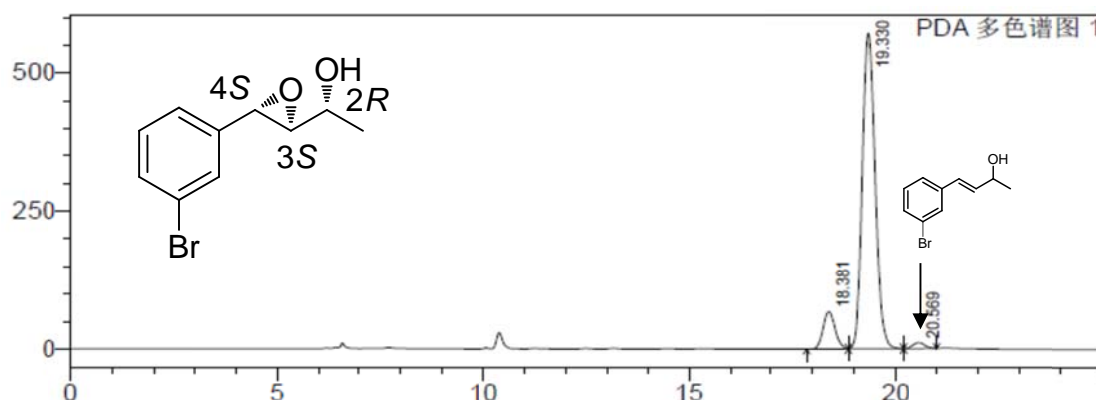

| Peak# | Ret. Time | Area     | Height | Area %  | Height % |
|-------|-----------|----------|--------|---------|----------|
| 1     | 18.381    | 1362641  | 68254  | 9.800   | 10.491   |
| 2     | 19.330    | 12322112 | 571550 | 88.624  | 87.851   |
| 3     | 20.569    | 219087   | 10785  | 1.576   | 1.658    |
| 总计    |           | 13903839 | 650590 | 100.000 | 100.000  |

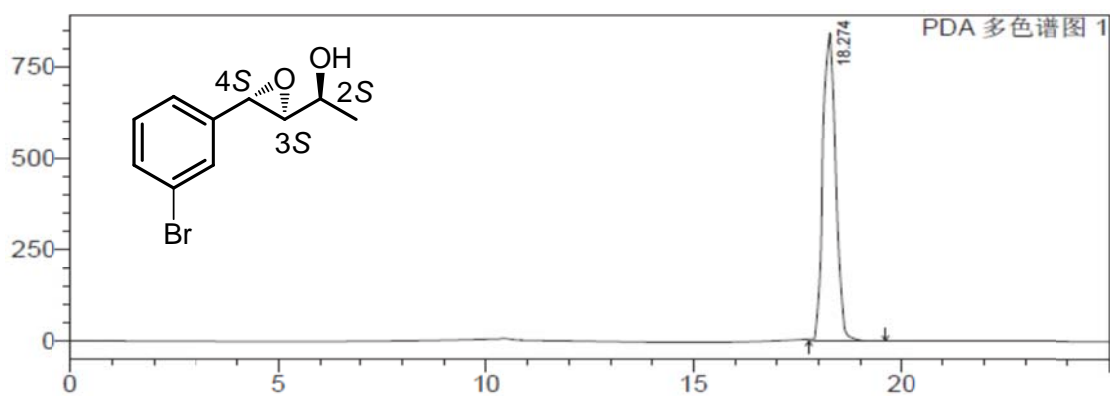

| Peak# | Ret. Time | Area     | Height | Area %  | Height % |
|-------|-----------|----------|--------|---------|----------|
| 1     | 18.274    | 17294922 | 842290 | 100.000 | 100.000  |
| 总计    |           | 17294922 | 842290 | 100.000 | 100.000  |

Standard sample of (*rac*)-**9a**

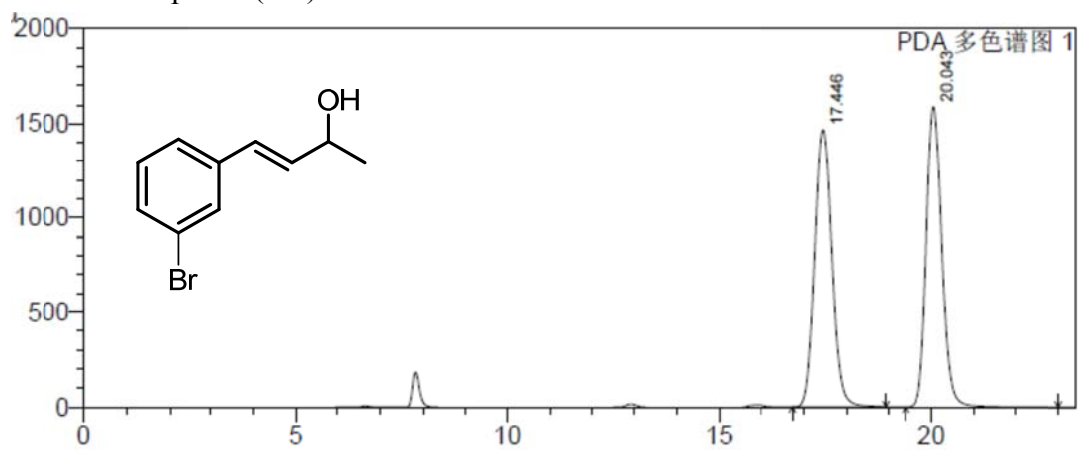

Chiral HPLC analysis for **10b** production (top to bottom):

Standard samples of (*rac*)-**10b**; products of the (*2R*)- and (*2S*)-system

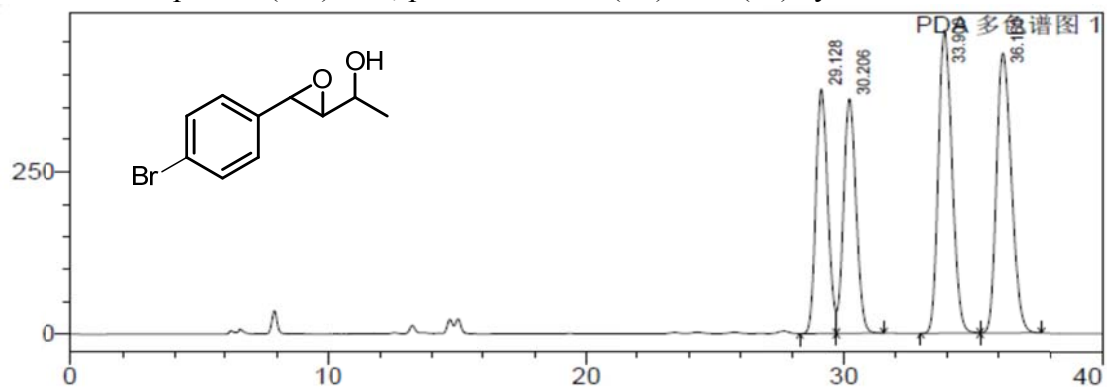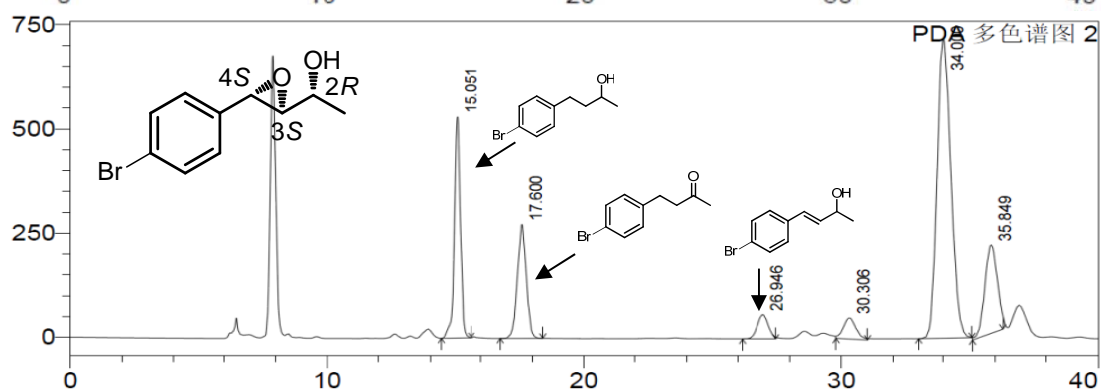

| Peak# | Ret. Time | Area     | Height  | Area %  | Height % |
|-------|-----------|----------|---------|---------|----------|
| 1     | 15.051    | 8479524  | 530642  | 16.218  | 28.757   |
| 2     | 17.600    | 6609417  | 272966  | 12.641  | 14.793   |
| 3     | 26.946    | 1783980  | 58960   | 3.412   | 3.195    |
| 4     | 30.306    | 1703110  | 50524   | 3.257   | 2.738    |
| 5     | 34.000    | 26603480 | 720149  | 50.881  | 39.028   |
| 6     | 35.849    | 7105941  | 211993  | 13.591  | 11.489   |
| 总计    |           | 52285452 | 1845234 | 100.000 | 100.000  |

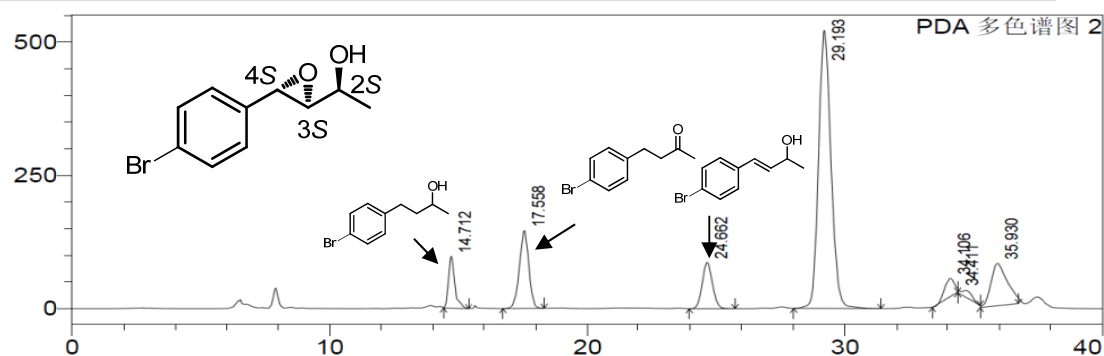

| Peak# | Ret. Time | Area     | Height | Area %  | Height % |
|-------|-----------|----------|--------|---------|----------|
| 1     | 14.712    | 1626527  | 97080  | 5.486   | 10.004   |
| 2     | 17.558    | 3660263  | 145458 | 12.345  | 14.989   |
| 3     | 24.662    | 2363311  | 86762  | 7.971   | 8.941    |
| 4     | 29.193    | 17268645 | 521199 | 58.244  | 53.710   |
| 5     | 34.106    | 894935   | 34490  | 3.018   | 3.554    |
| 6     | 34.411    | 354265   | 5913   | 1.195   | 0.609    |
| 7     | 35.930    | 3480662  | 79497  | 11.740  | 8.192    |
| 总计    |           | 29648608 | 970397 | 100.000 | 100.000  |

Standard samples of (*rac*)-**10a**, **10e** and (*rac*)-**10f**

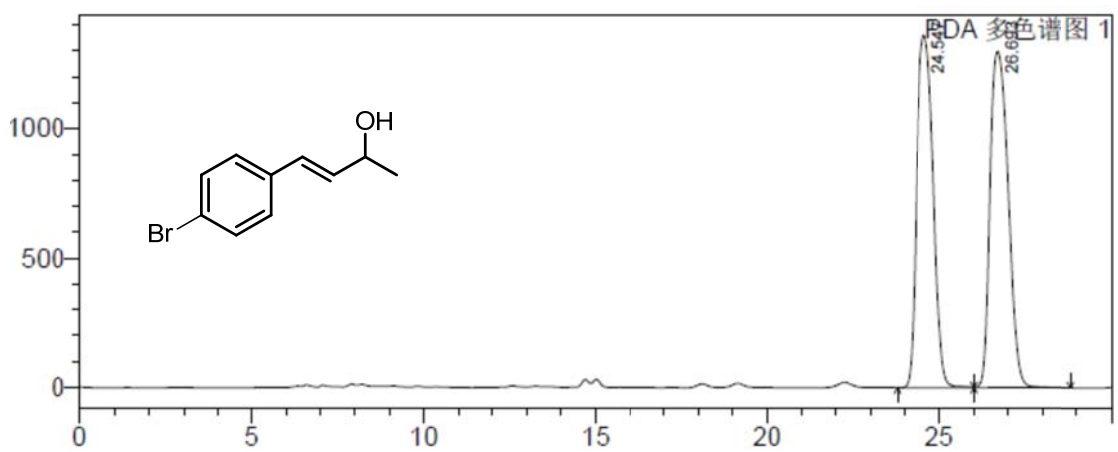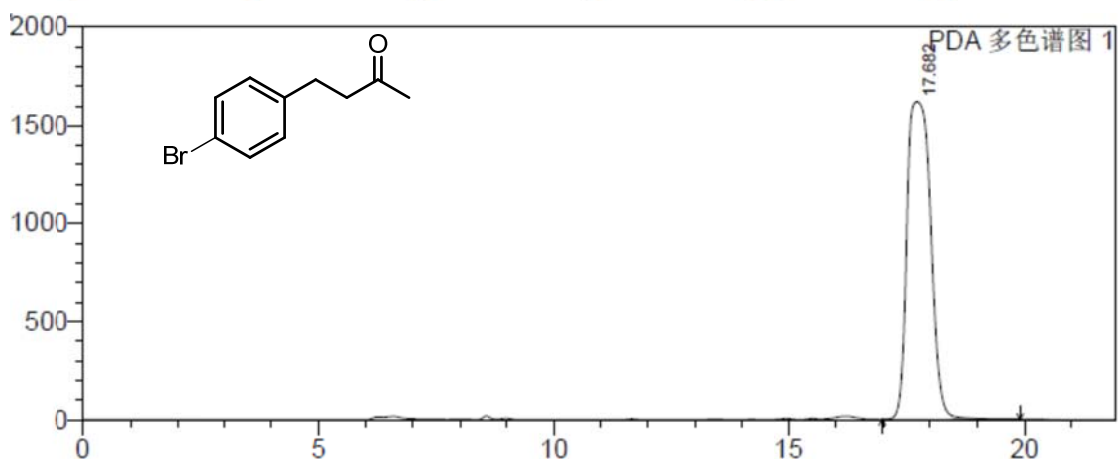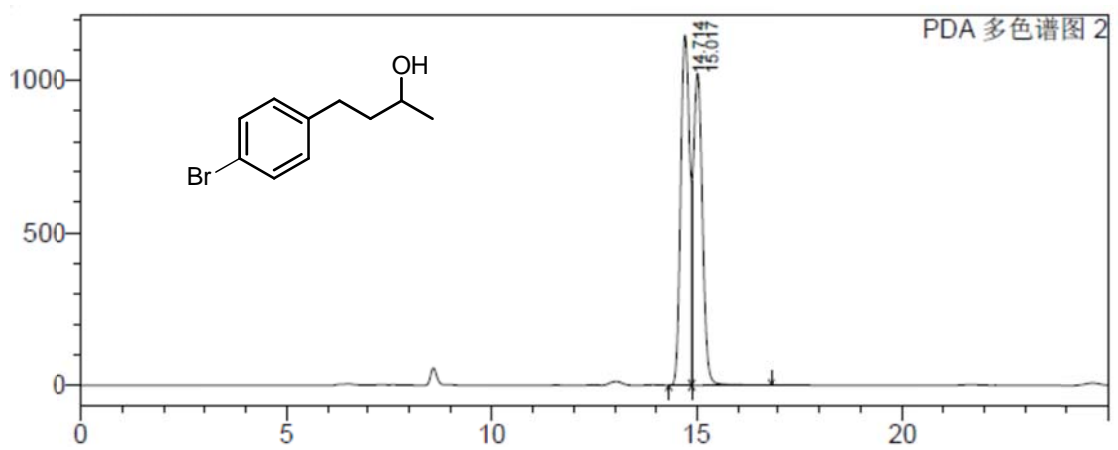

Chiral HPLC analysis for **11b** production (top to bottom):

Standard samples of (*rac*)-**11b**; products of the (*2R*)- and (*2S*)-system

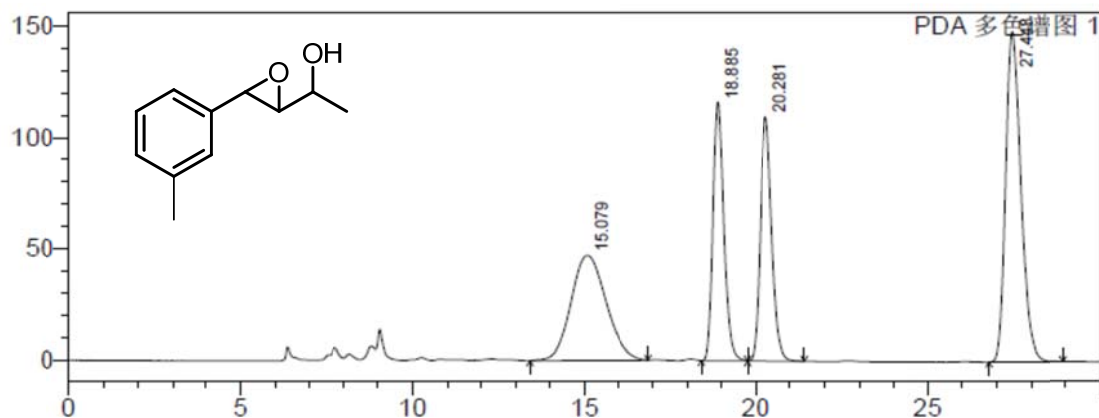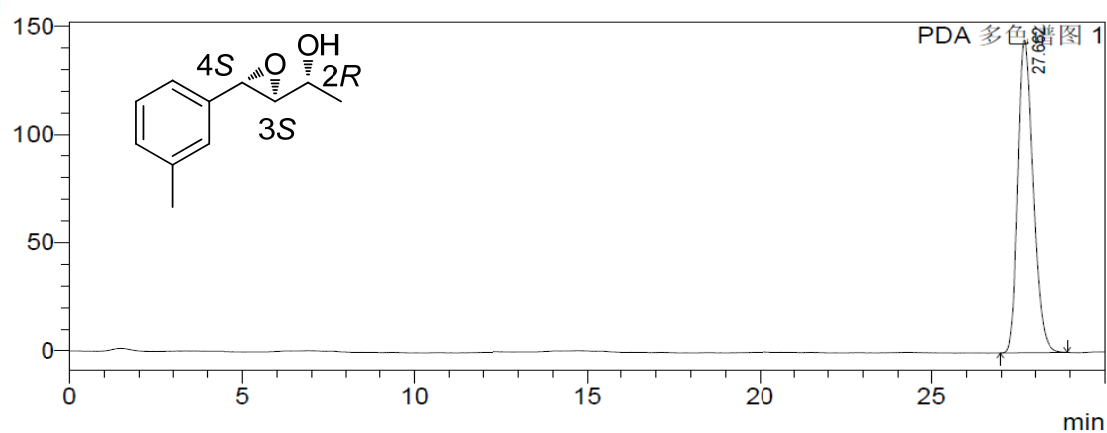

| Peak# | Ret. Time | Area    | Height | Area %  | Height % |
|-------|-----------|---------|--------|---------|----------|
| 1     | 27.662    | 4451576 | 144602 | 100.000 | 100.000  |
| 总计    |           | 4451576 | 144602 | 100.000 | 100.000  |

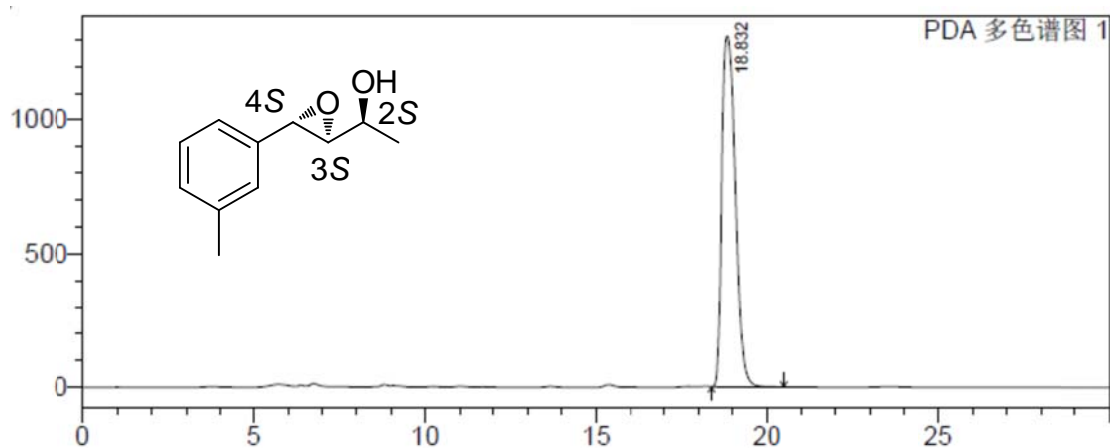

| Peak# | Ret. Time | Area     | Height  | Area %  | Height % |
|-------|-----------|----------|---------|---------|----------|
| 1     | 18.832    | 35968125 | 1311268 | 100.000 | 100.000  |
| 总计    |           | 35968125 | 1311268 | 100.000 | 100.000  |

Chiral HPLC analysis for **12b** production (top to bottom):

Standard samples of (*rac*)-**12b**; products of the (*2R*)- and (*2S*)-system

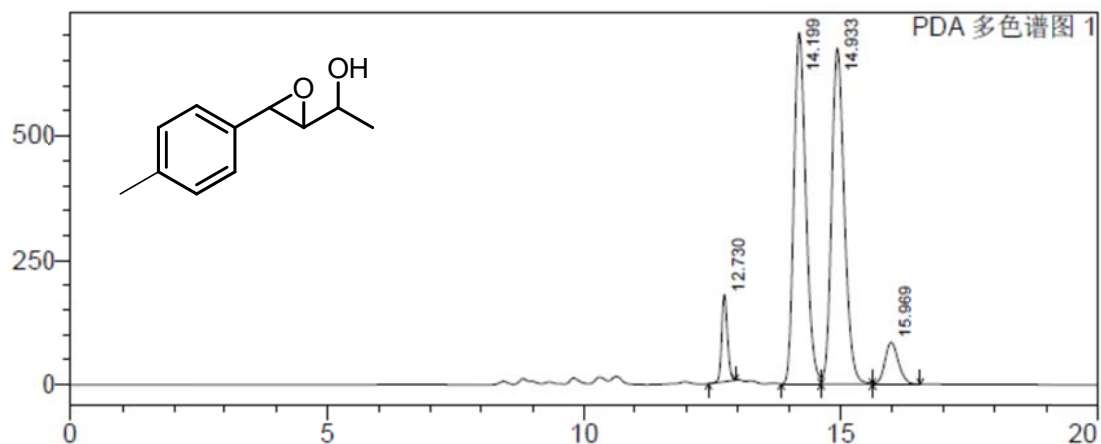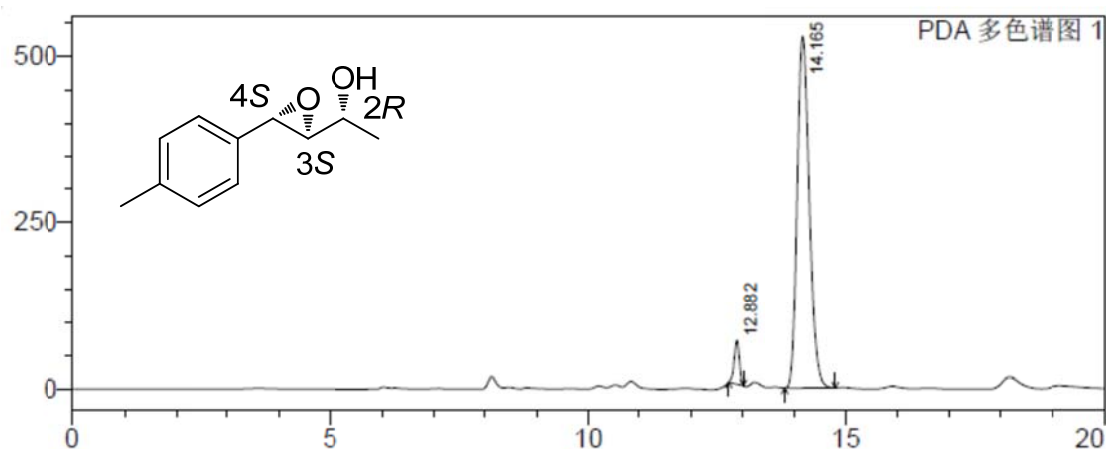

| Peak# | Ret. Time | Area    | Height | Area %  | Height % |
|-------|-----------|---------|--------|---------|----------|
| 1     | 12.882    | 453542  | 65582  | 5.044   | 11.057   |
| 2     | 14.165    | 8538400 | 527534 | 94.956  | 88.943   |
| 总计    |           | 8991942 | 593116 | 100.000 | 100.000  |

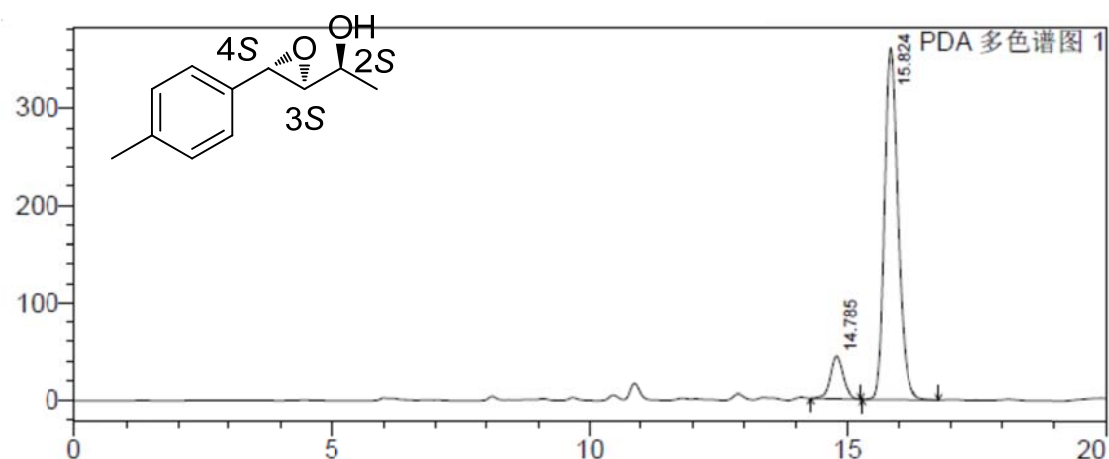

| Peak# | Ret. Time | Area    | Height | Area %  | Height % |
|-------|-----------|---------|--------|---------|----------|
| 1     | 14.785    | 744772  | 43215  | 10.141  | 10.702   |
| 2     | 15.824    | 6599243 | 360592 | 89.859  | 89.298   |
| 总计    |           | 7344015 | 403808 | 100.000 | 100.000  |

## NMR spectra of products

### $^1\text{H}$ -NMR and $^{13}\text{C}$ NMR spectra of (2*R*)-b

$^1\text{H-NMR}$  and  $^{13}\text{C-NMR}$  spectra of (2*R*)-**1b**

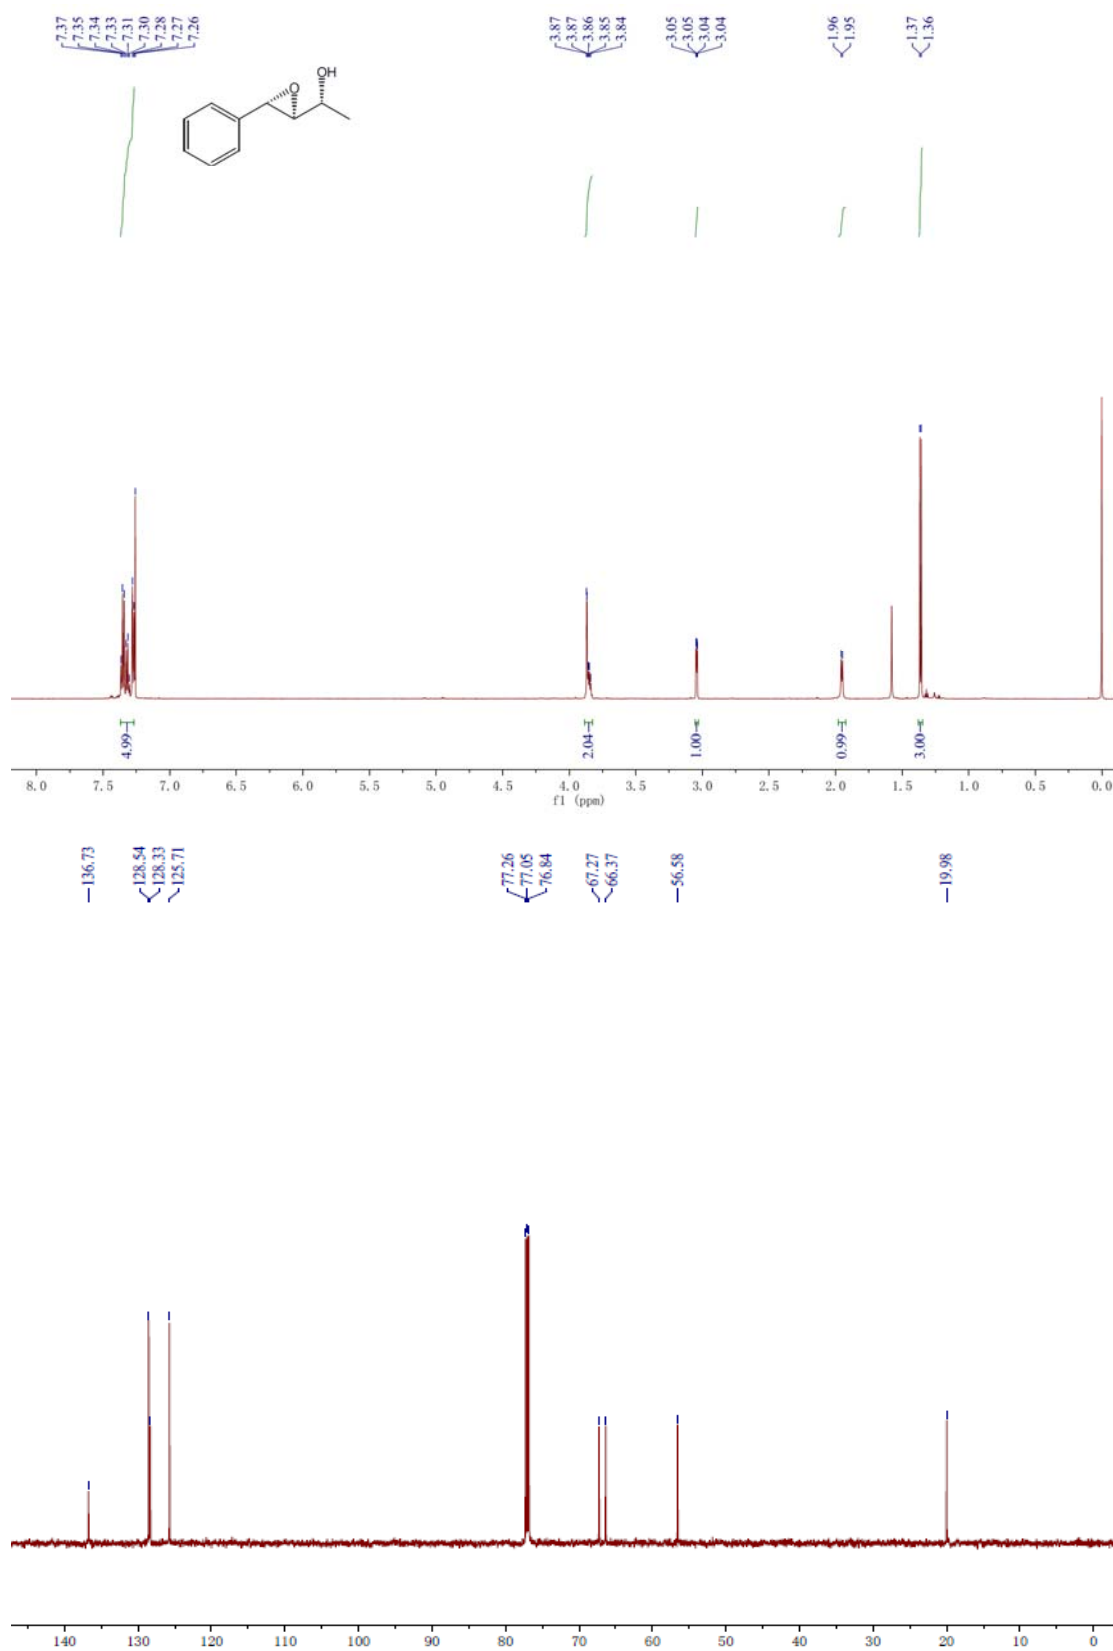



$^1\text{H-NMR}$  and  $^{13}\text{C-NMR}$  spectra of (2*R*)-**2b**

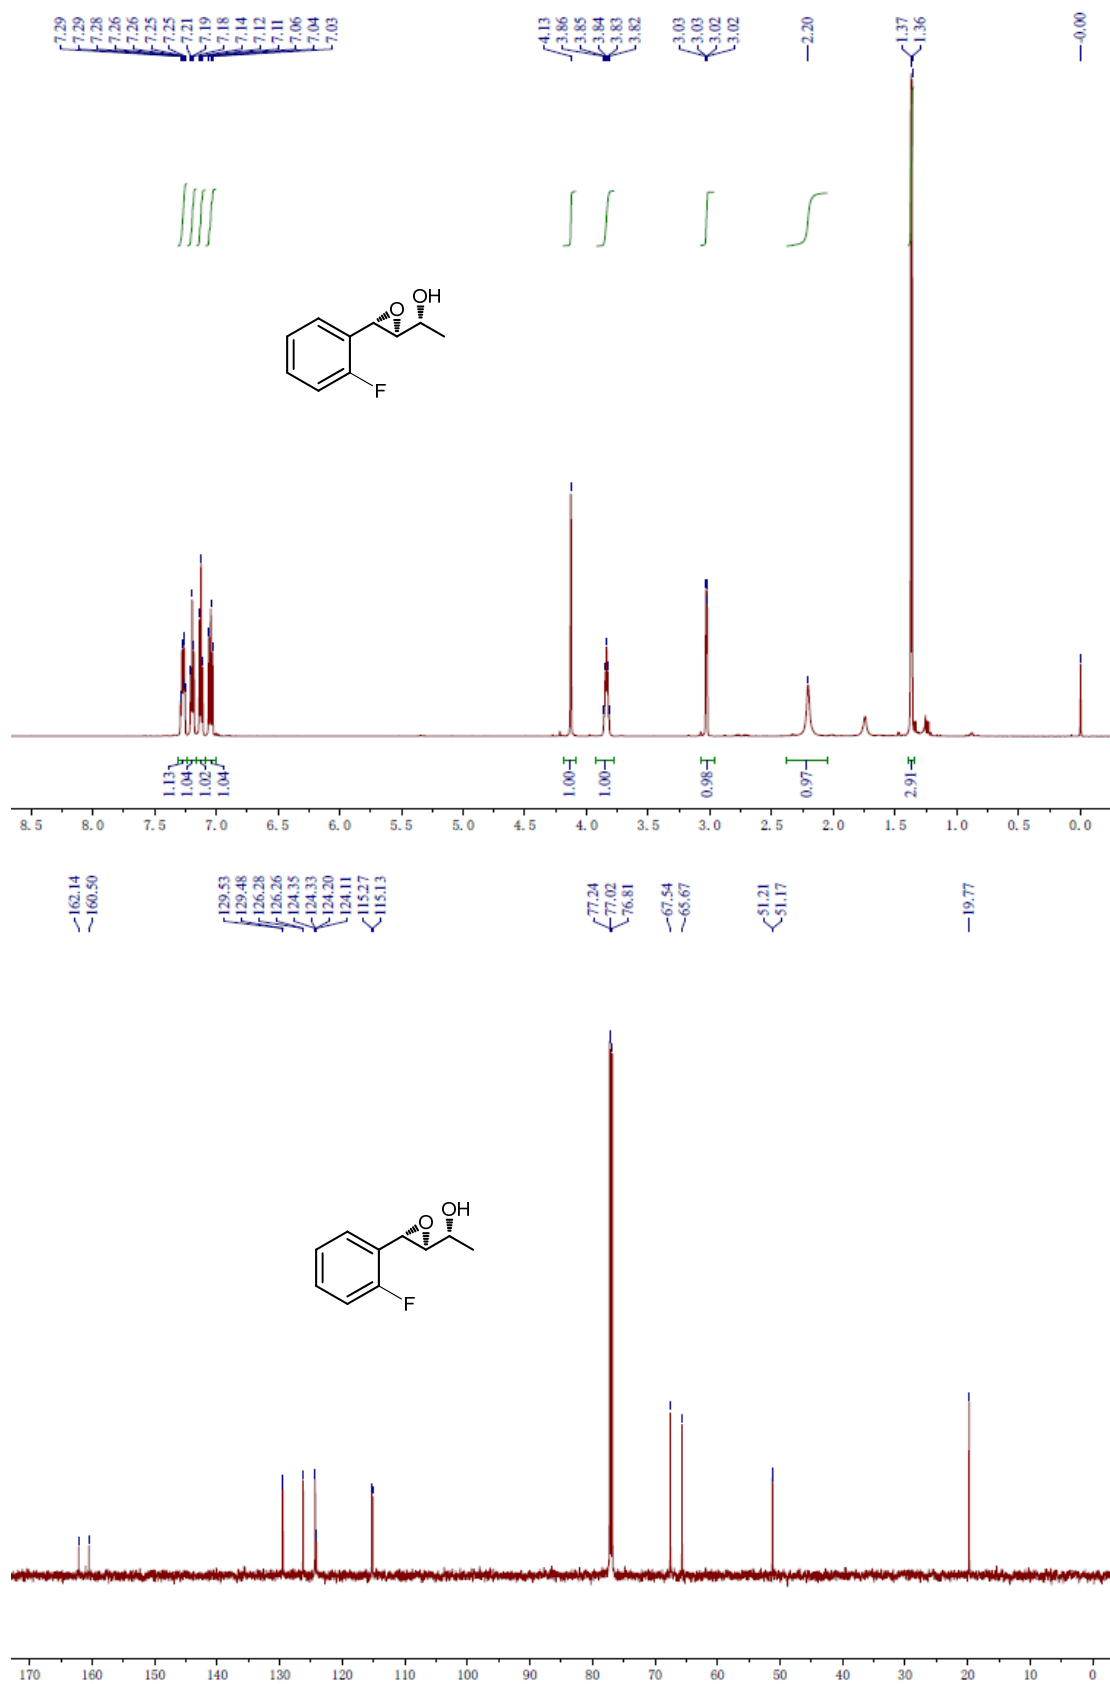

$^1\text{H-NMR}$  and  $^{13}\text{C-NMR}$  spectra of (2*R*)-**3b**

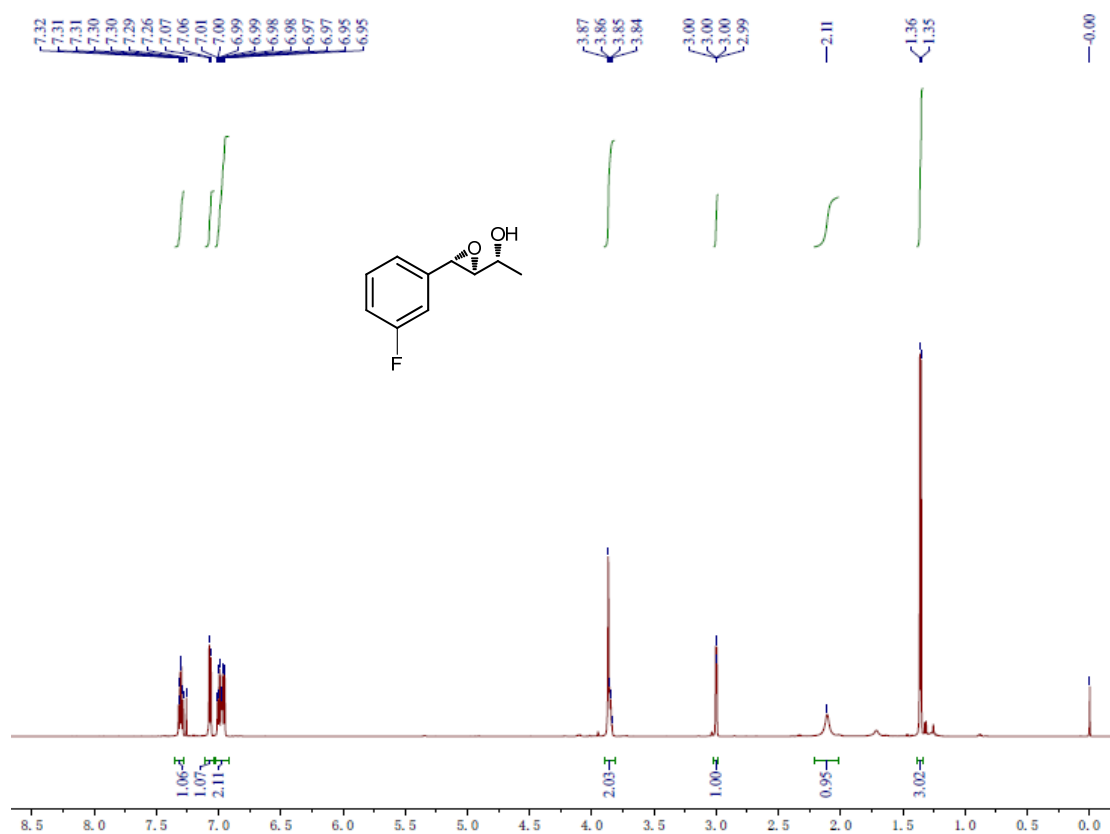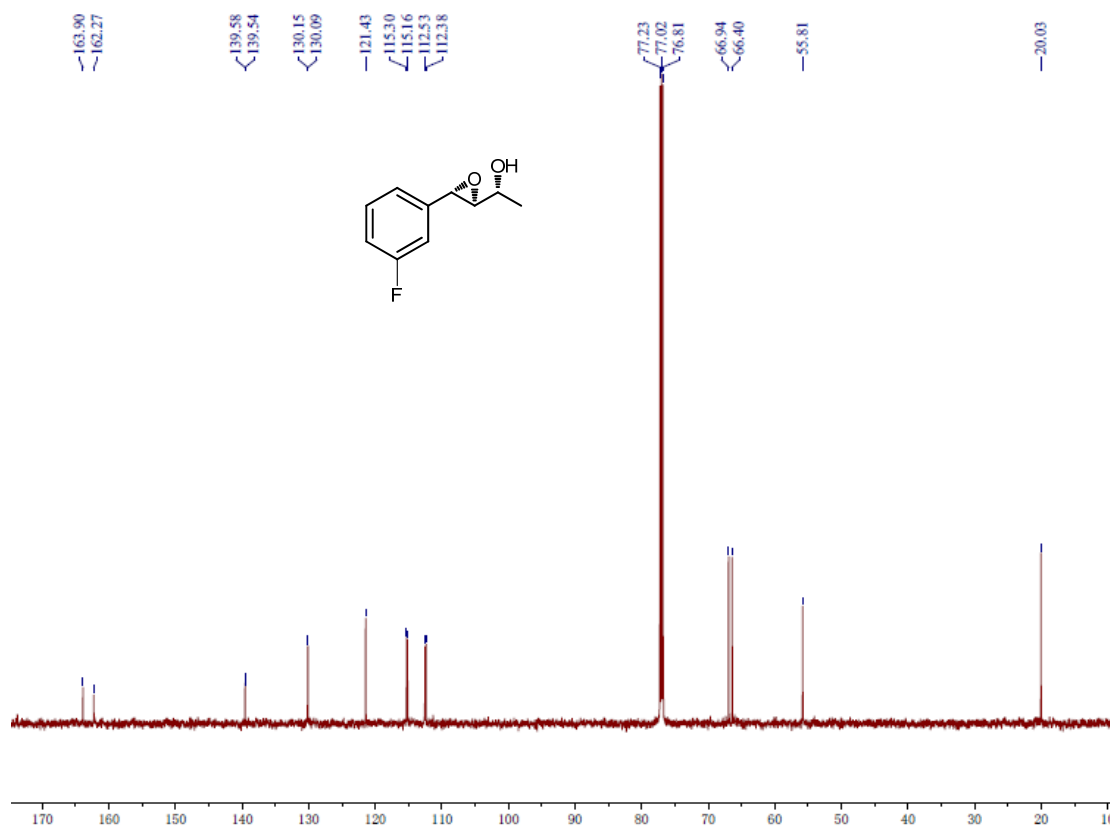

$^1\text{H-NMR}$  and  $^{13}\text{C-NMR}$  spectra of (2*R*)-**4b**

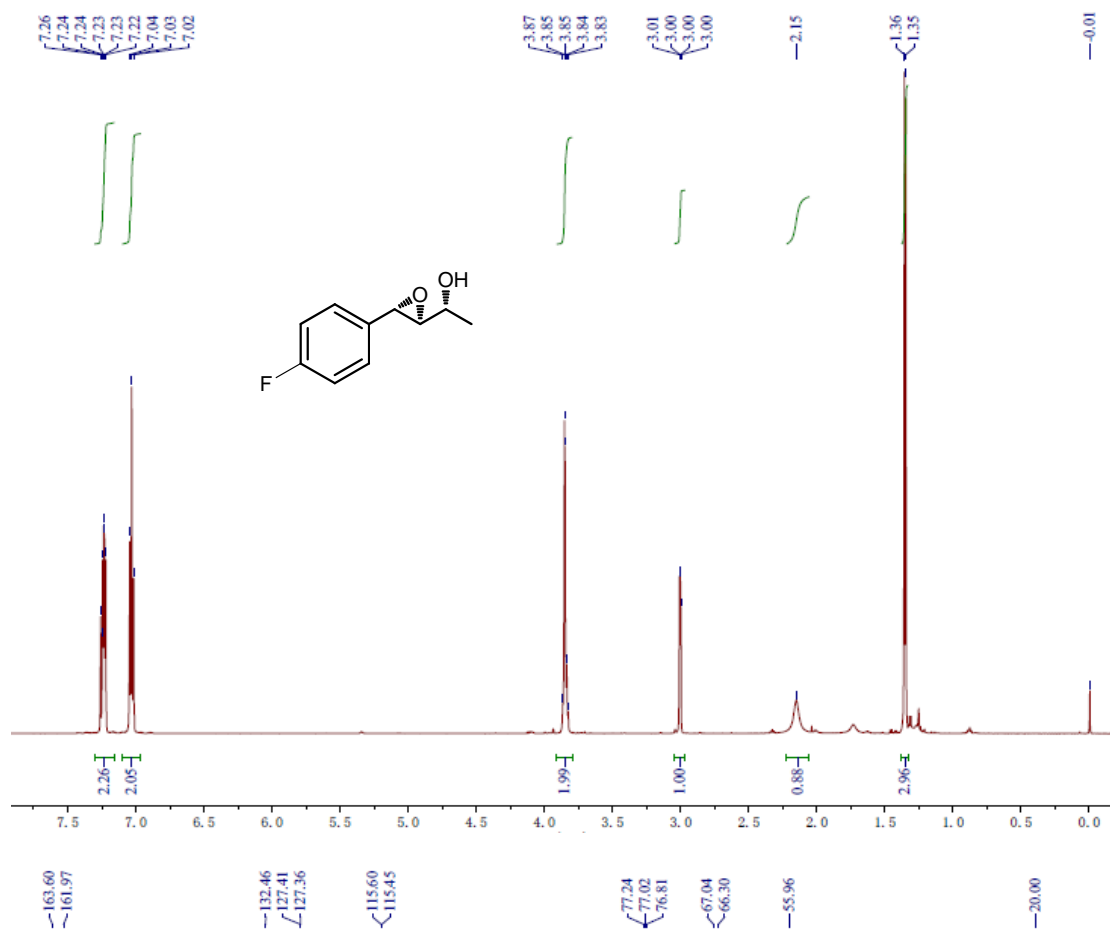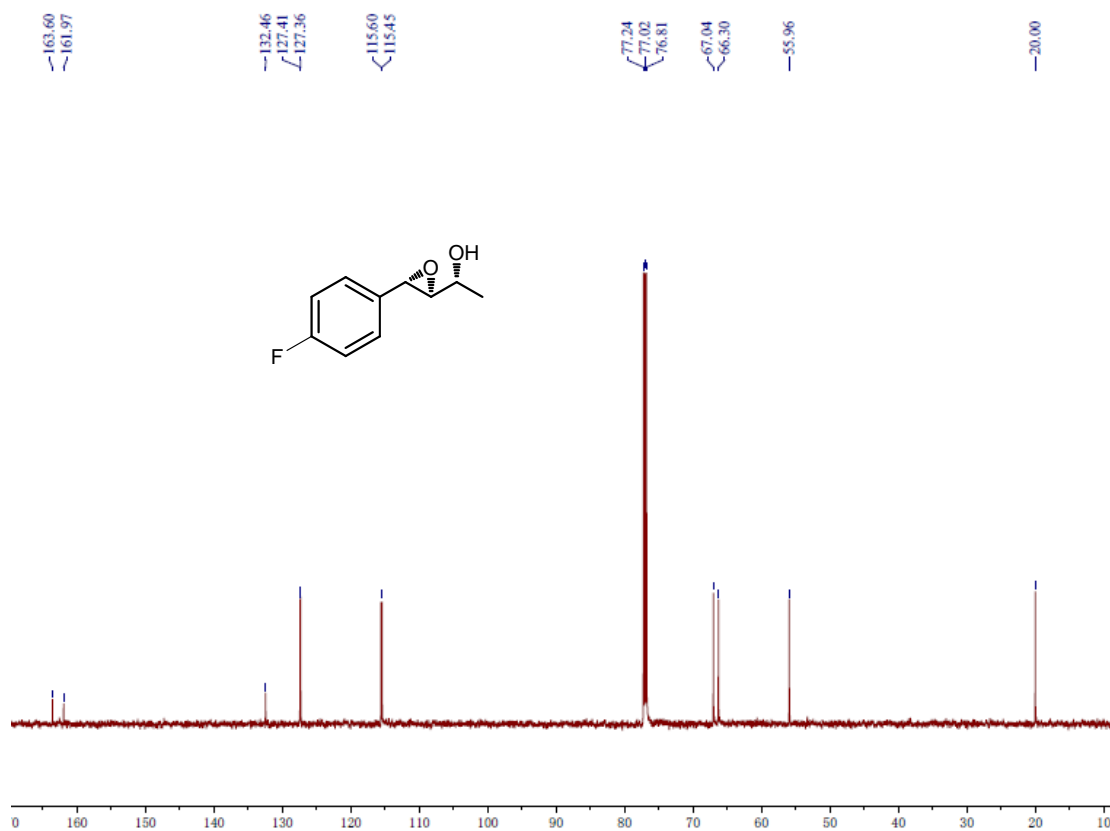

<sup>1</sup>H-NMR spectra of (2*R*)-**5b**

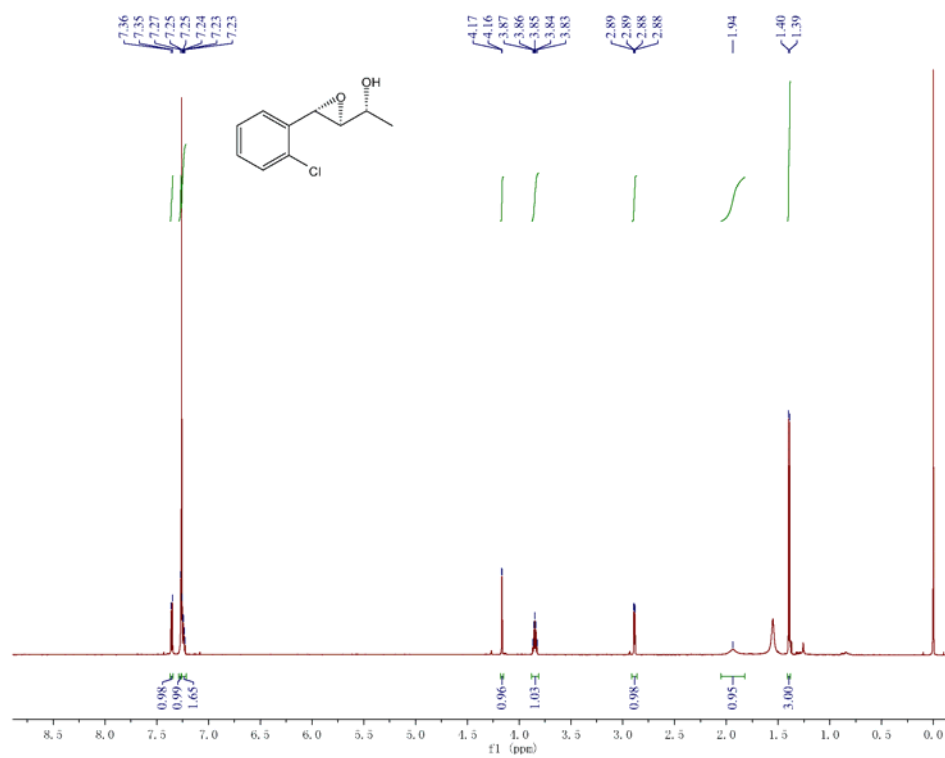

$^1\text{H-NMR}$  and  $^{13}\text{C-NMR}$  spectra of (2*R*)-**6b**

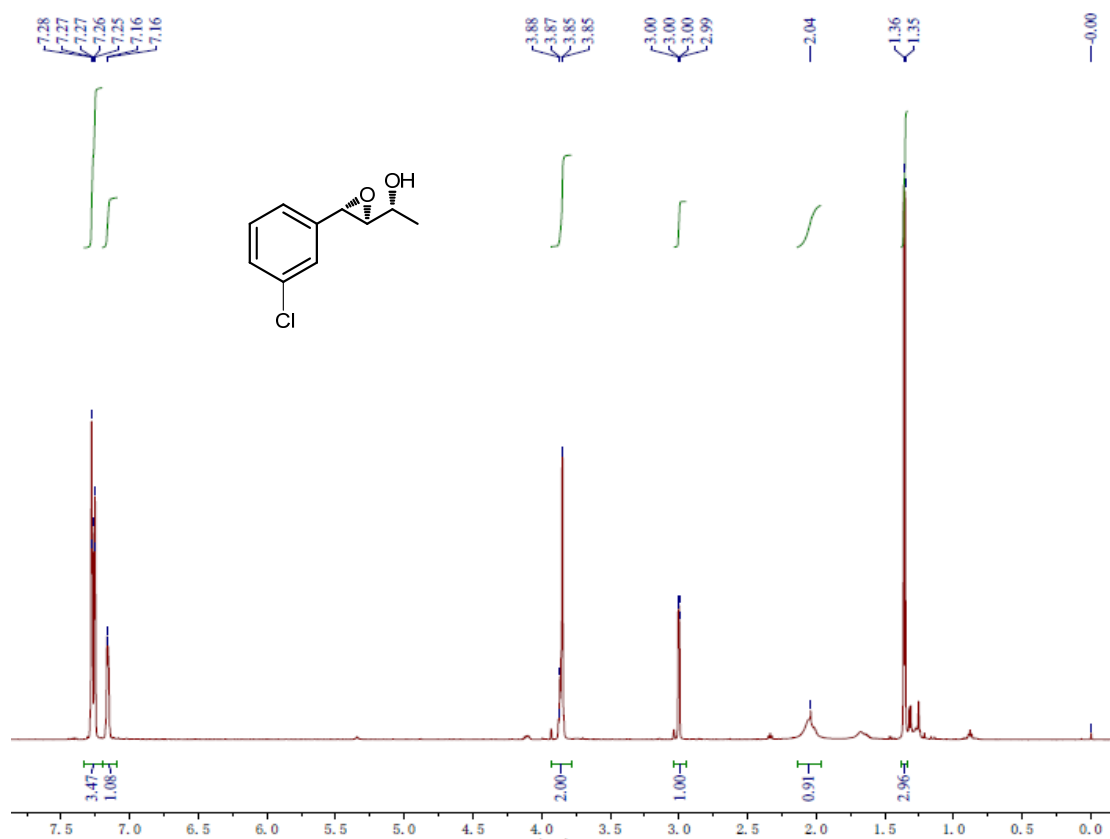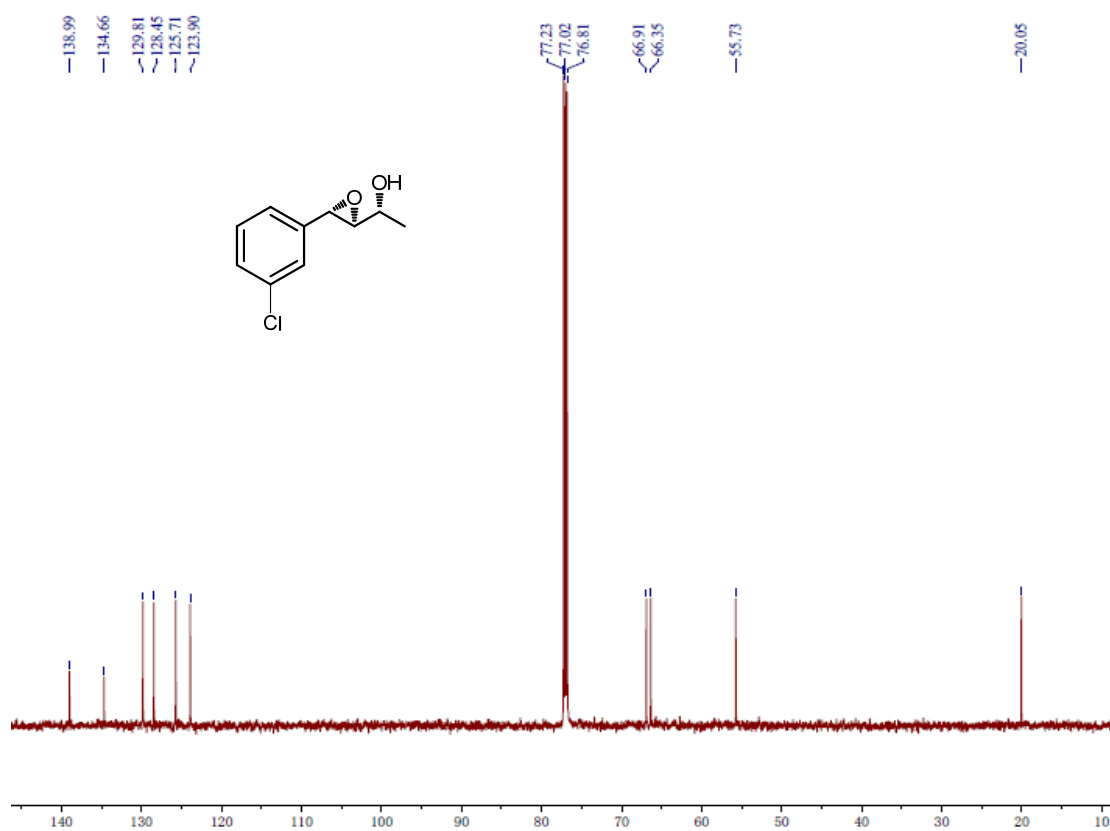

$^1\text{H-NMR}$  and  $^{13}\text{C-NMR}$  spectra of (2*R*)-**7b**

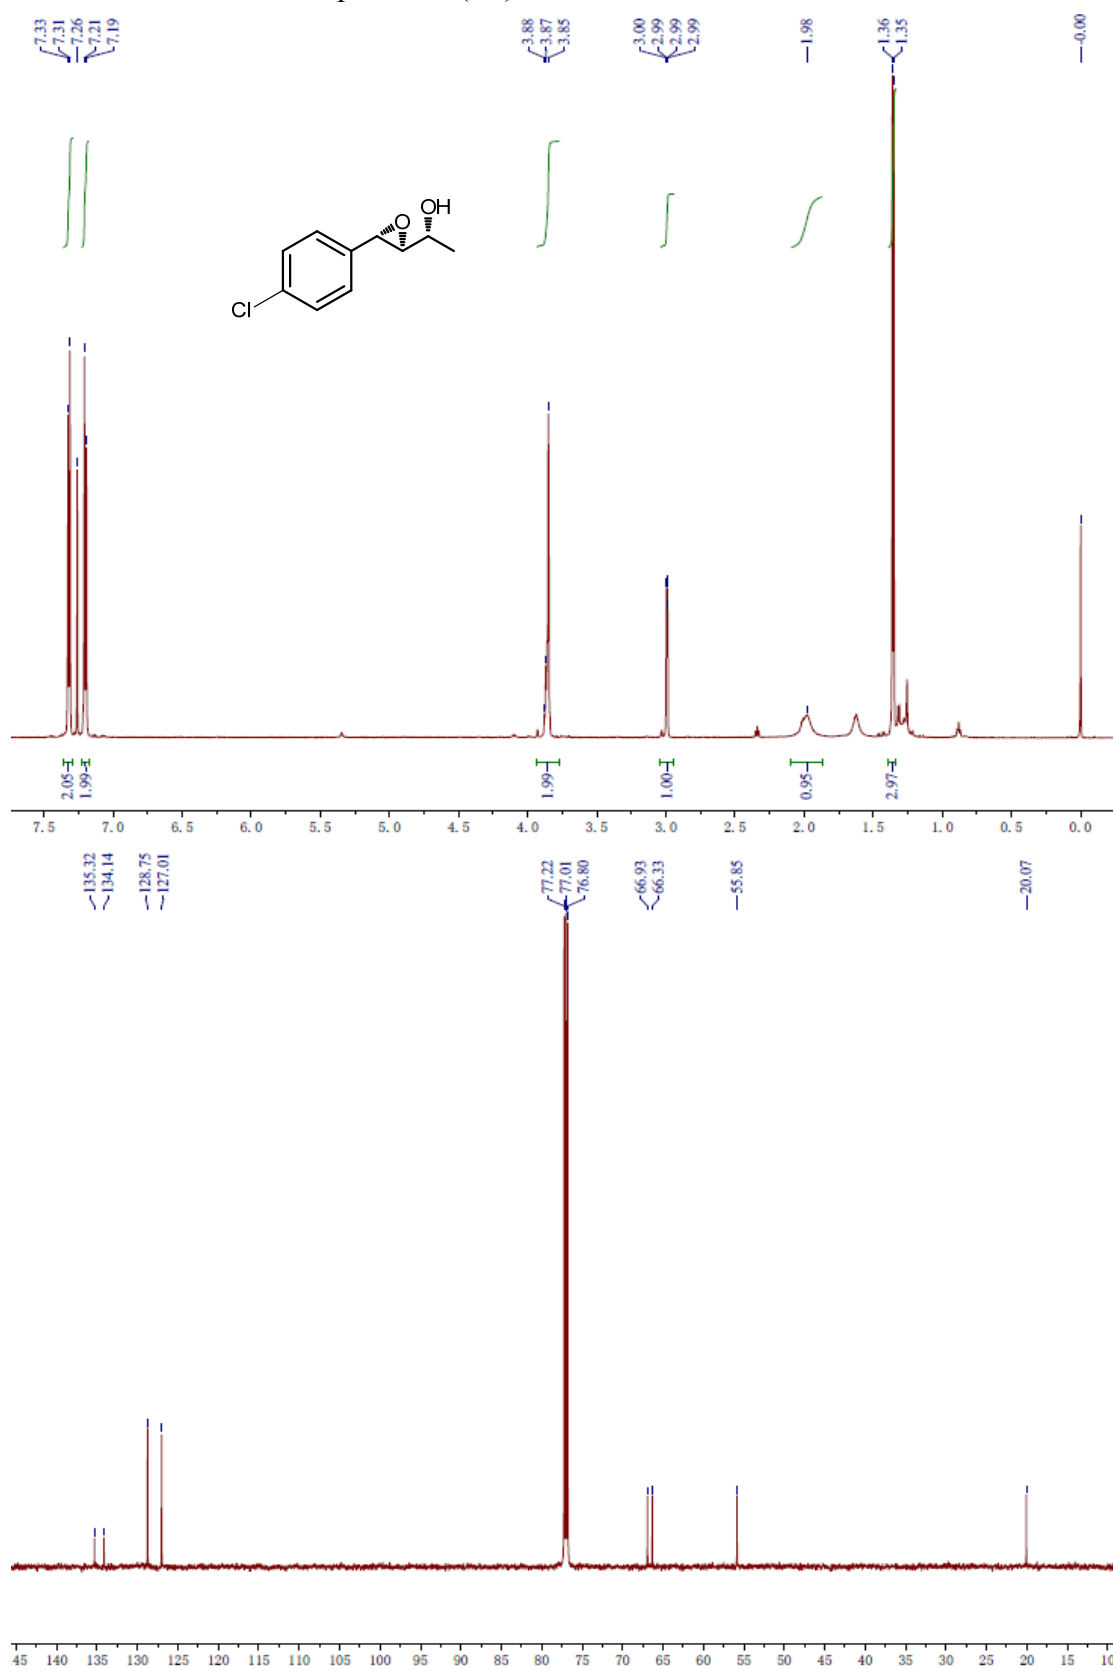

<sup>1</sup>H-NMR spectra of (2*R*)-**8b**

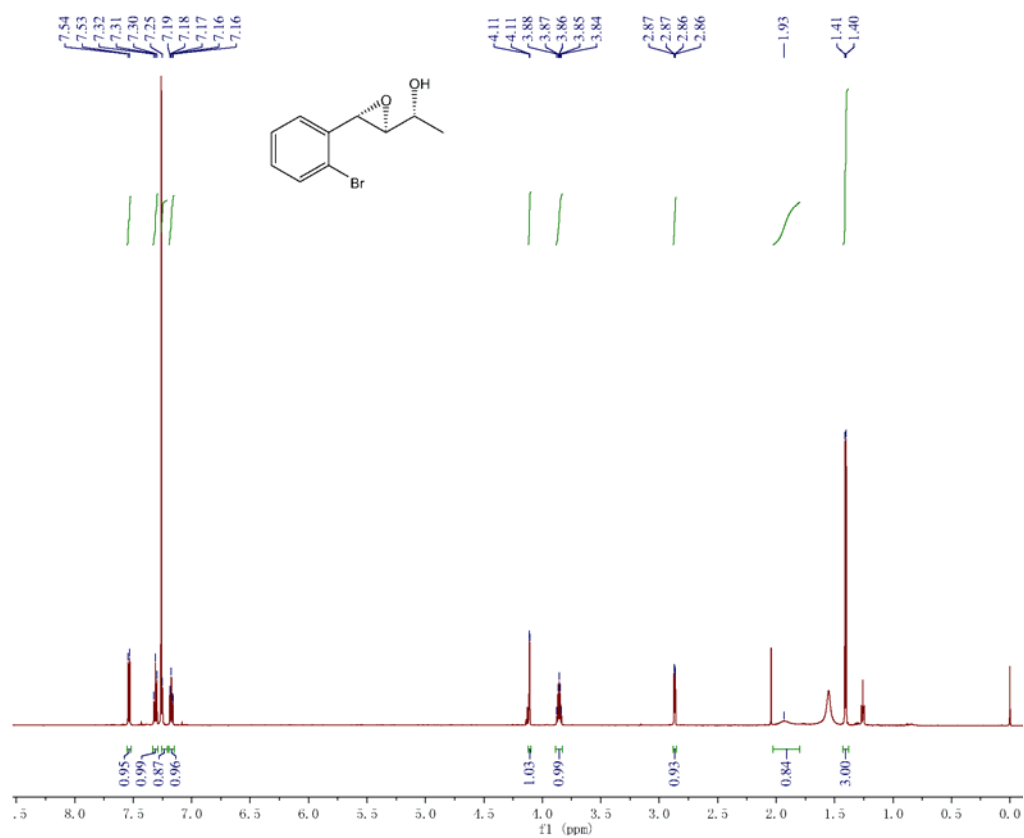

$^1\text{H-NMR}$  and  $^{13}\text{C-NMR}$  spectra of (2*R*)-**9b**

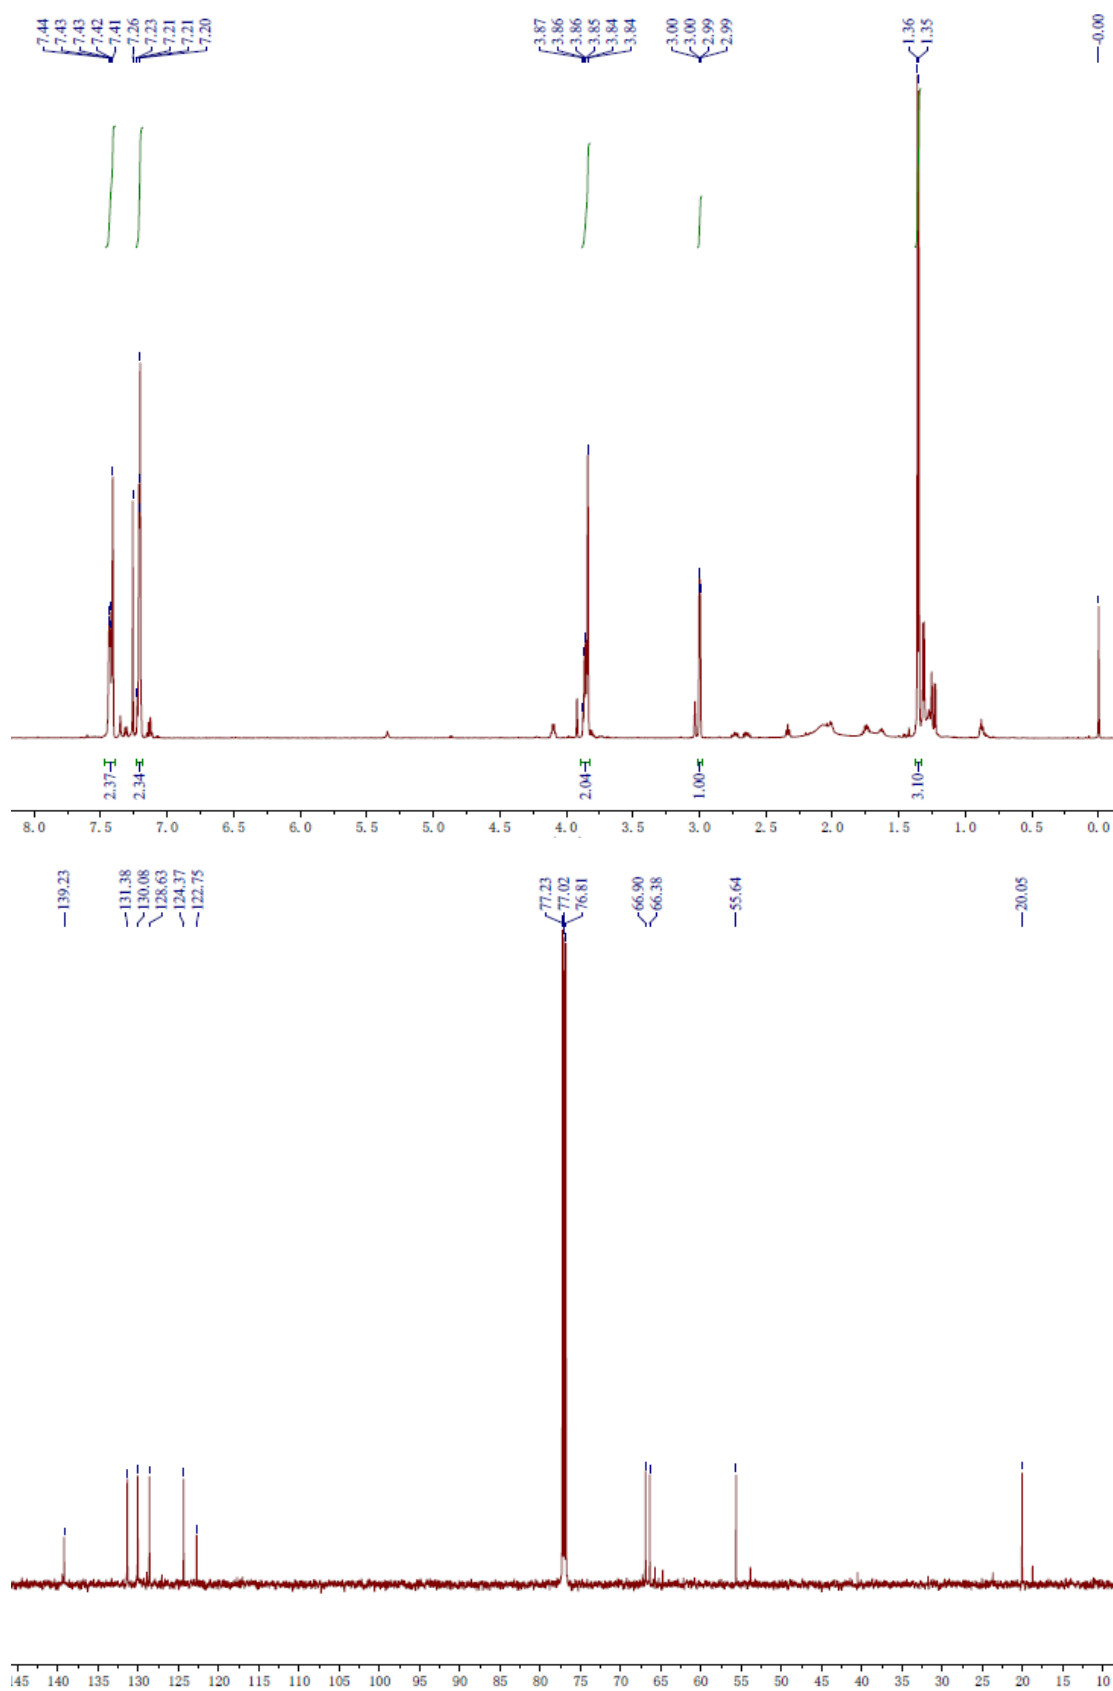



$^1\text{H-NMR}$  and  $^{13}\text{C-NMR}$  spectra of (2*R*)-**10b**

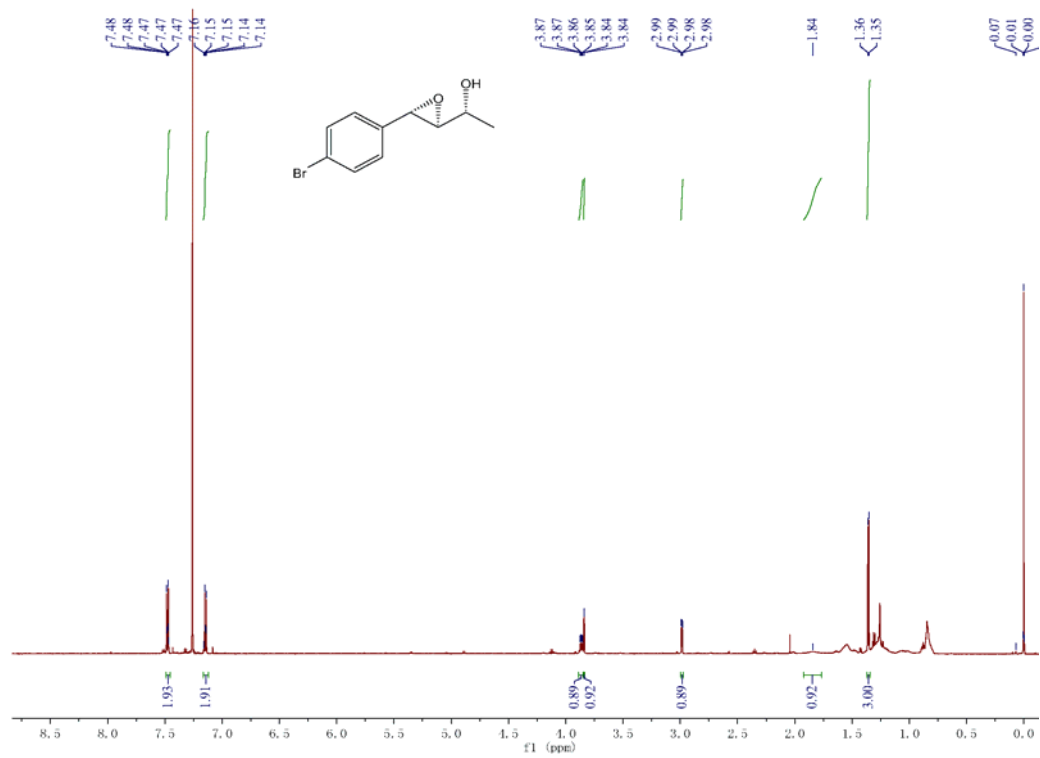

$^1\text{H-NMR}$  and  $^{13}\text{C-NMR}$  spectra of (2*R*)-**11b**

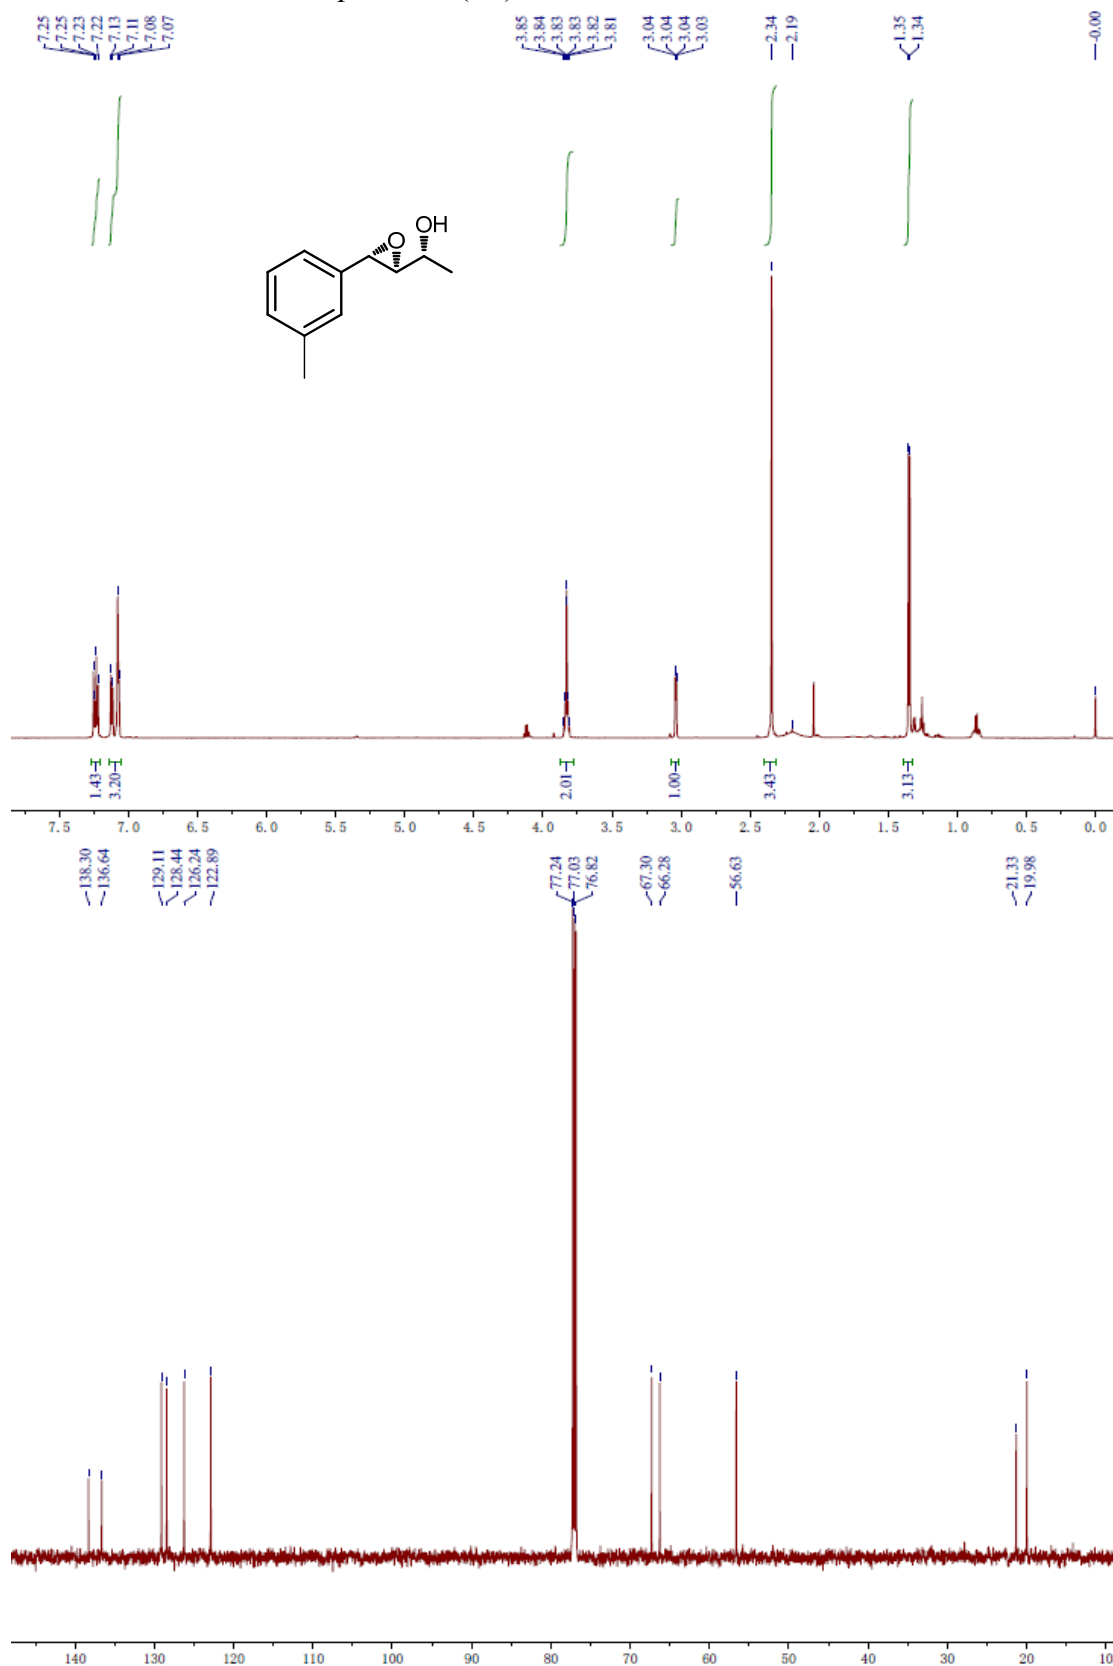

$^1\text{H-NMR}$  and  $^{13}\text{C-NMR}$  spectra of (2*R*)-**12b**

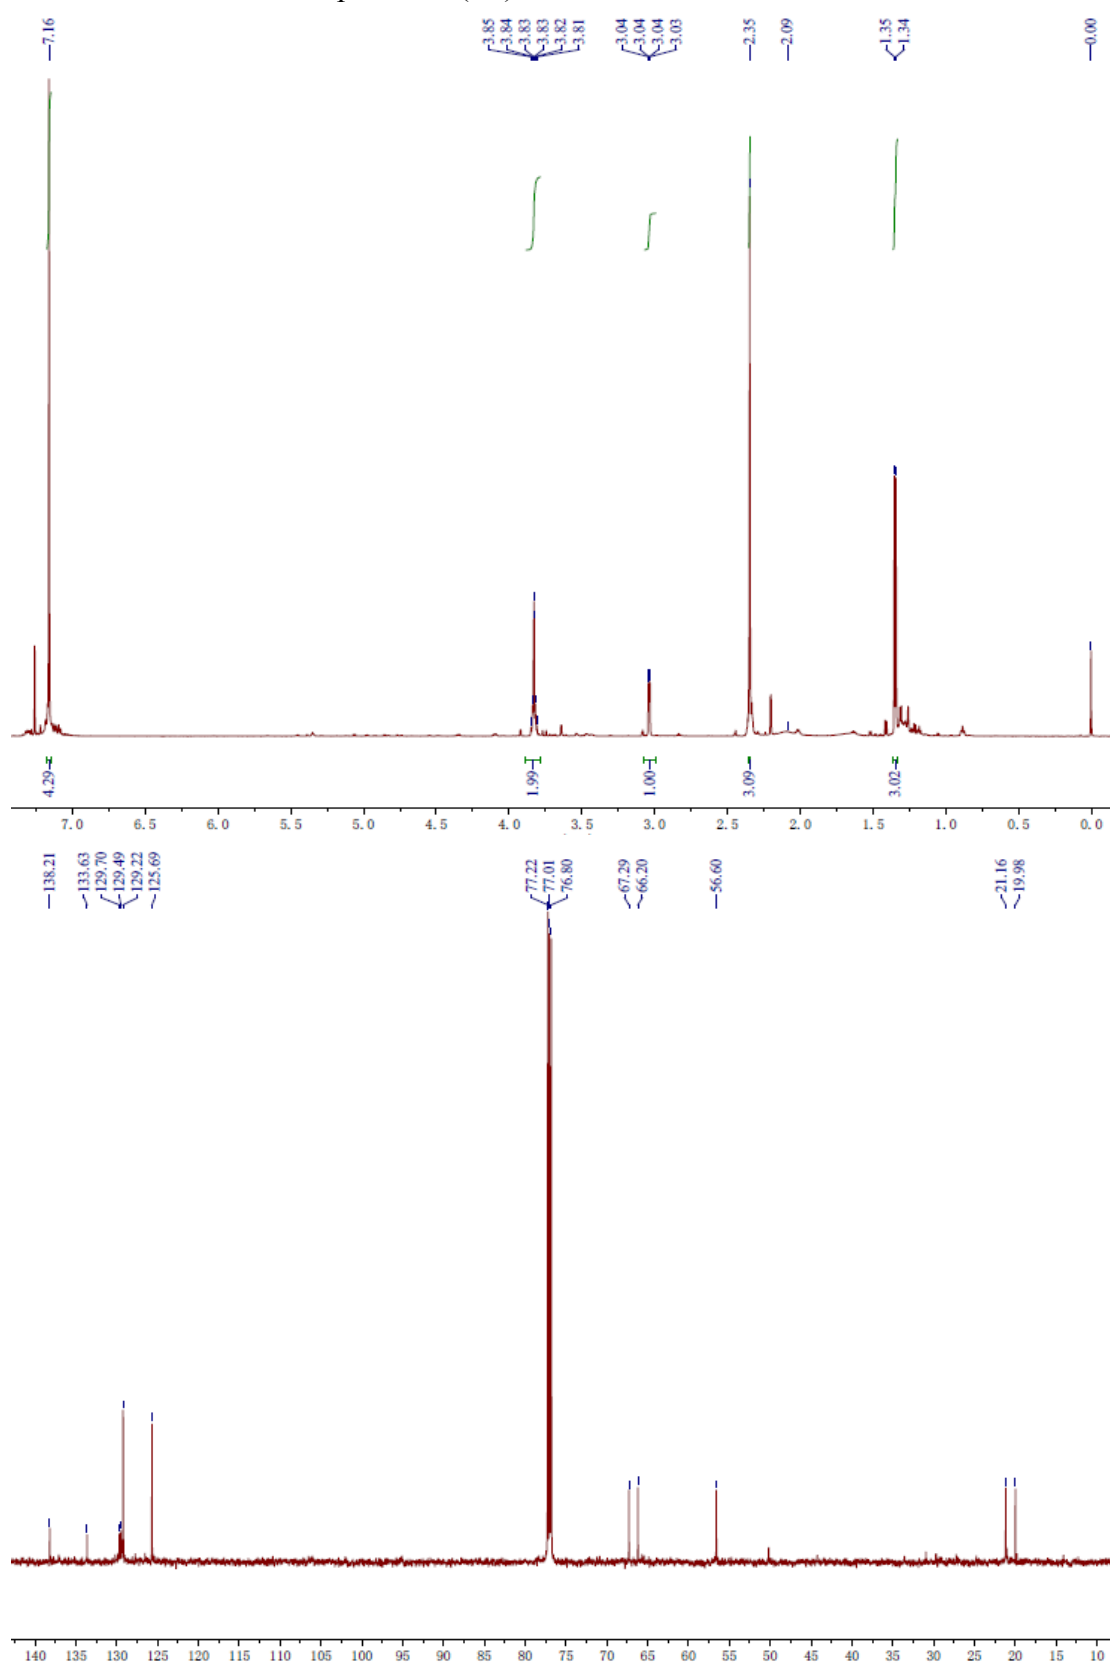

**<sup>1</sup>H-NMR spectra of (2*S*)-b**

$^1\text{H-NMR}$  spectrum of (2*S*)-**1b**

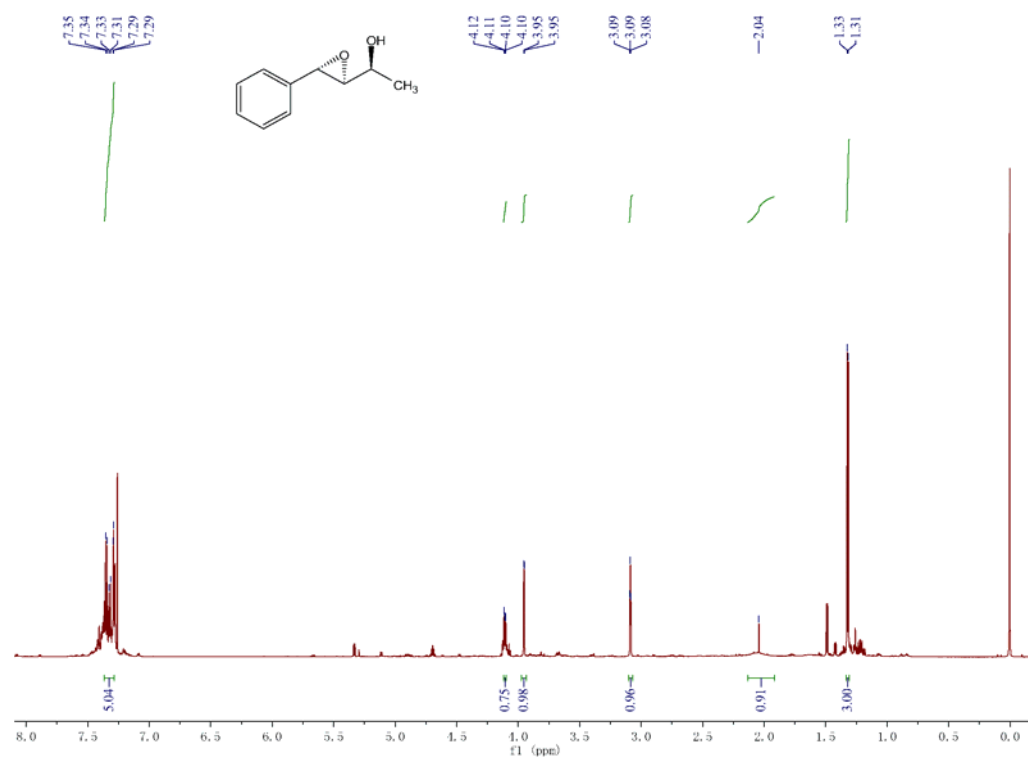

$^1\text{H-NMR}$  spectrum of (2*S*)-**2b**

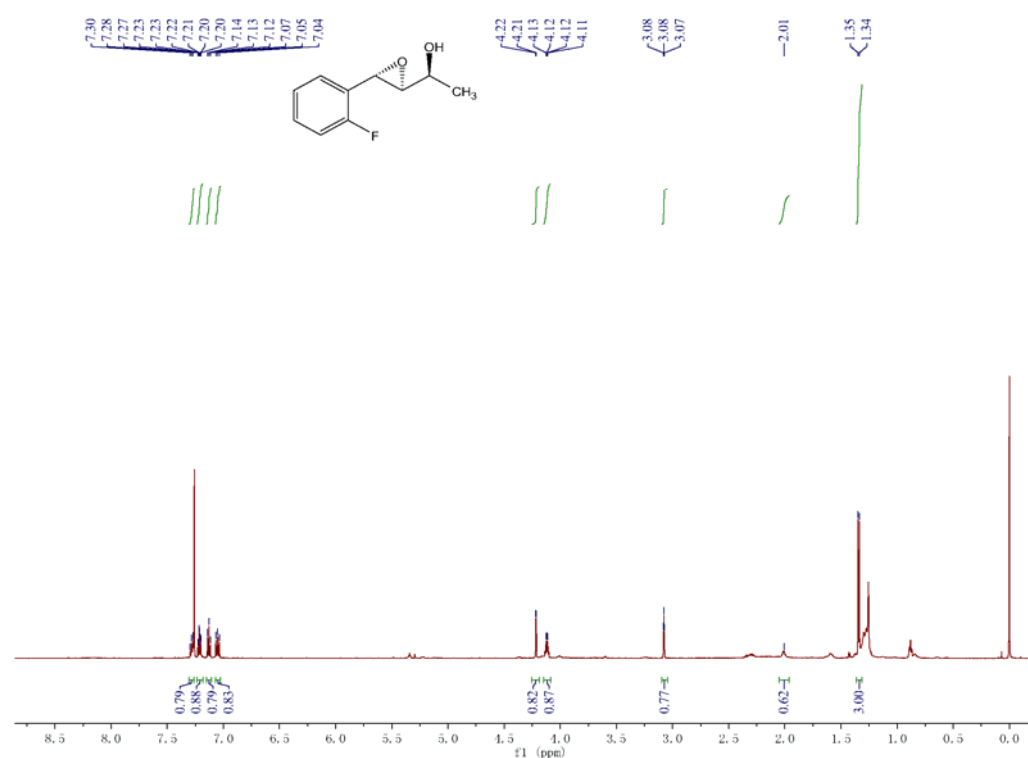

$^1\text{H-NMR}$  spectrum of (2*S*)-**3b**

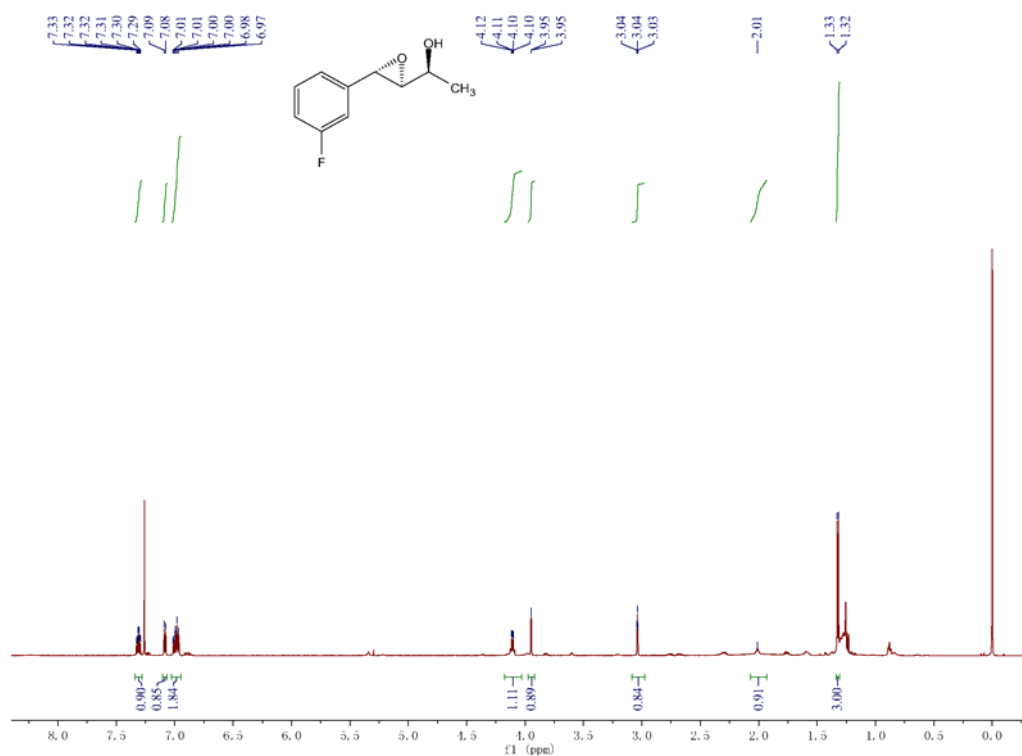

$^1\text{H-NMR}$  spectrum of (2*S*)-**4b**

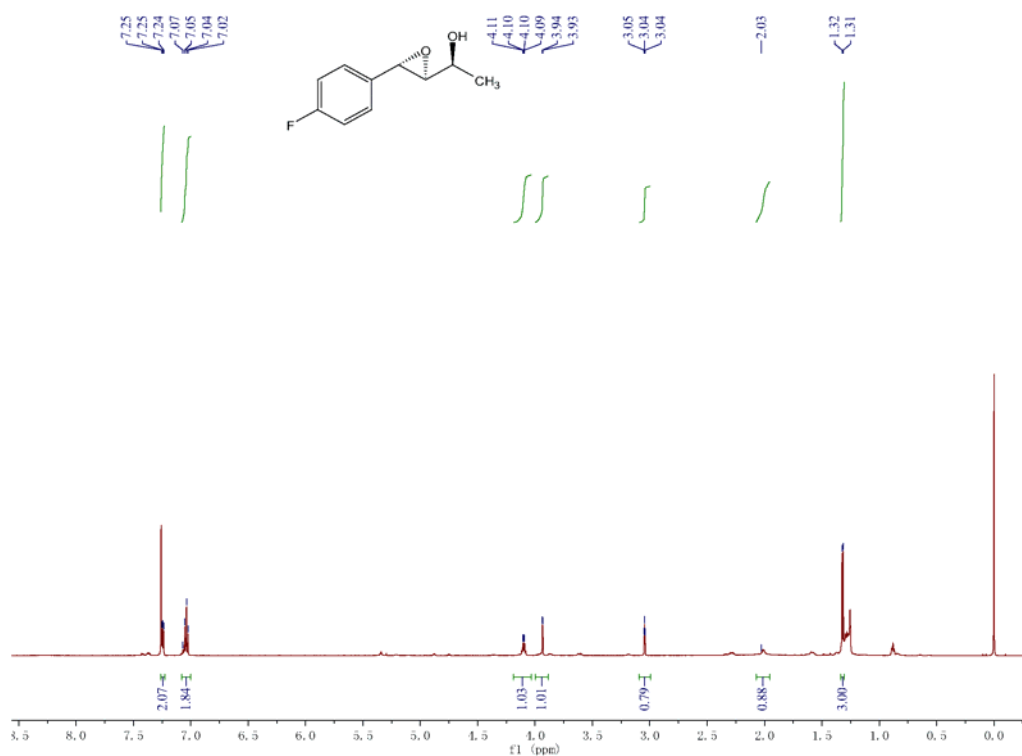

$^1\text{H-NMR}$  spectrum of (2*S*)-**5b**

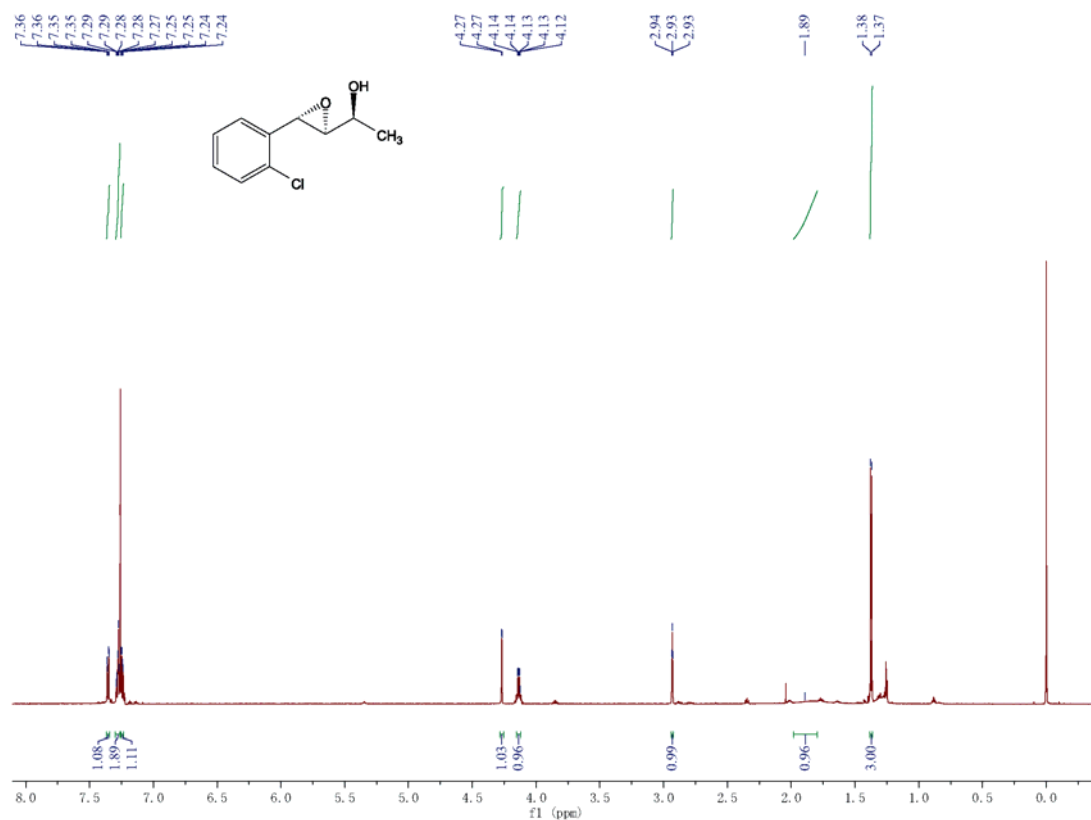

$^1\text{H-NMR}$  spectrum of (2*S*)-**6b**

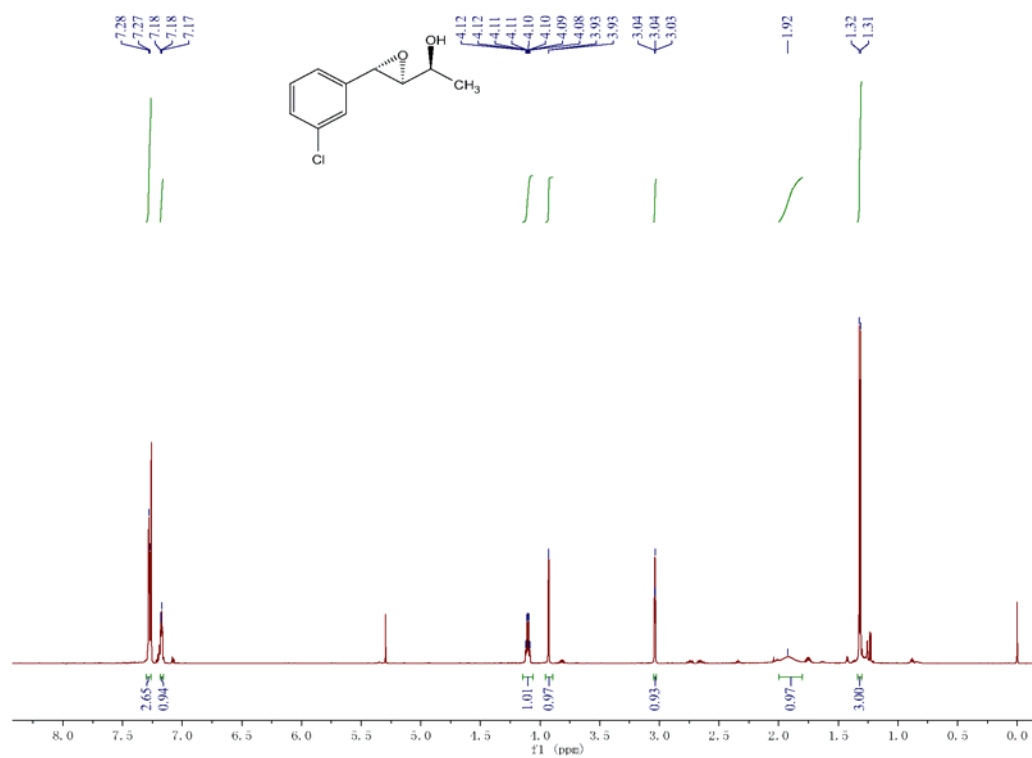

$^1\text{H-NMR}$  spectrum of (2*S*)-**7b**

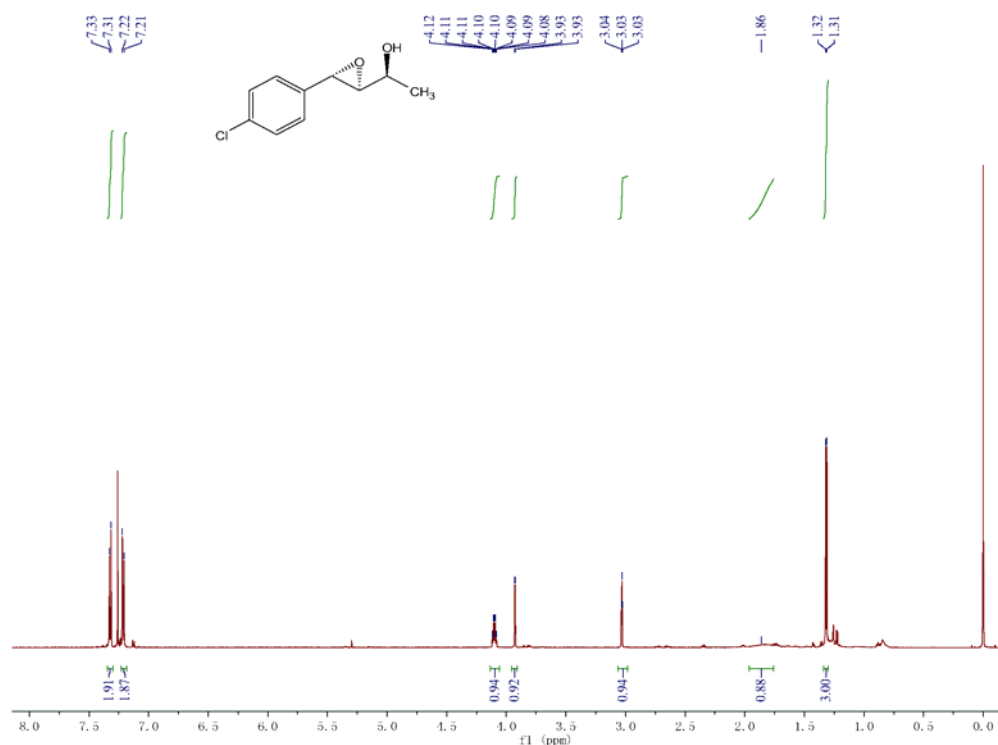

$^1\text{H-NMR}$  spectrum of (2*S*)-**8b**

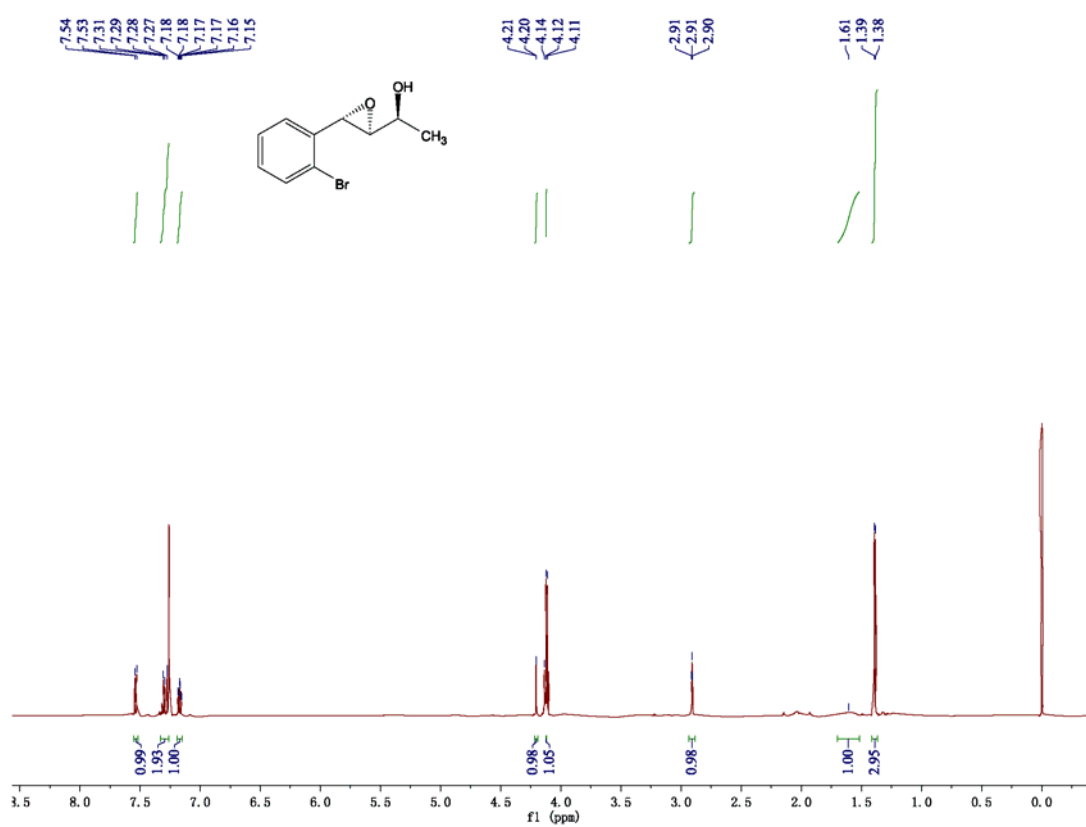



$^1\text{H-NMR}$  spectrum of (2*S*)-**9b**

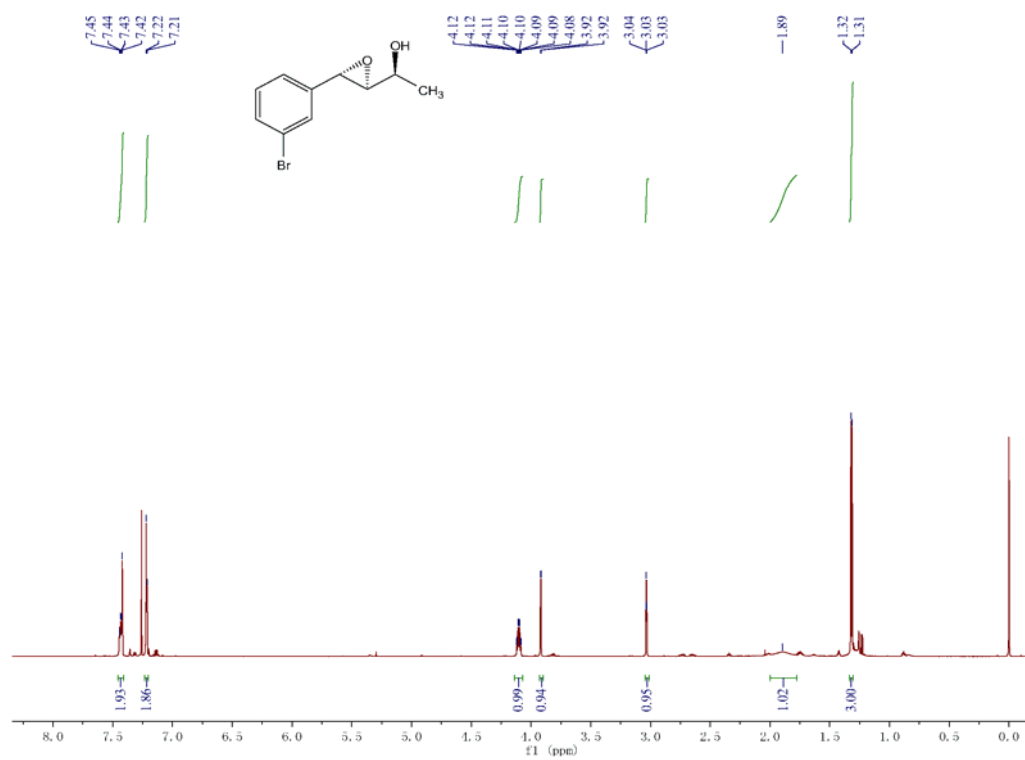

$^1\text{H-NMR}$  spectrum of (2*S*)-**10b**

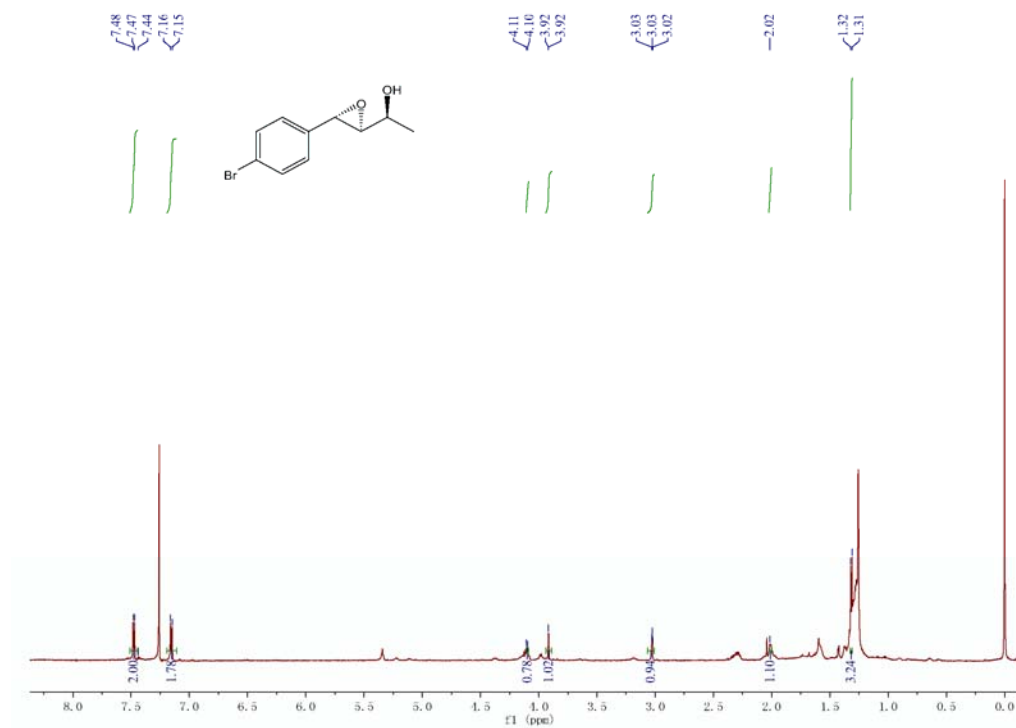

$^1\text{H-NMR}$  spectrum of (2*S*)-**11b**

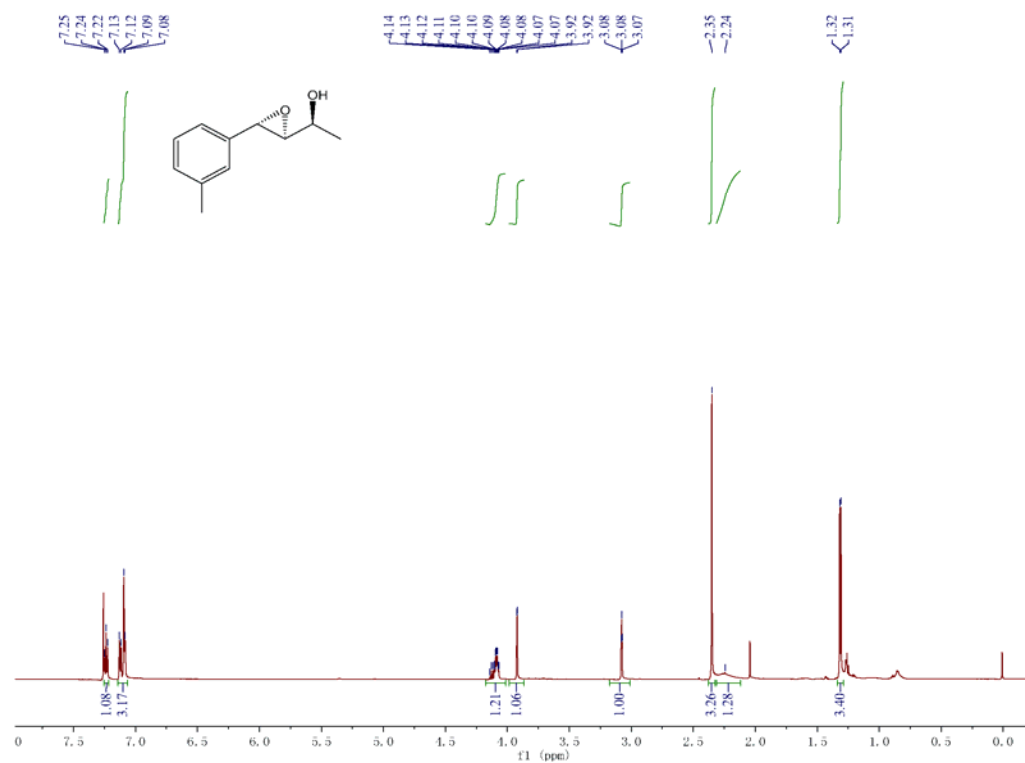

$^1\text{H-NMR}$  spectrum of (2*S*)-**12b**

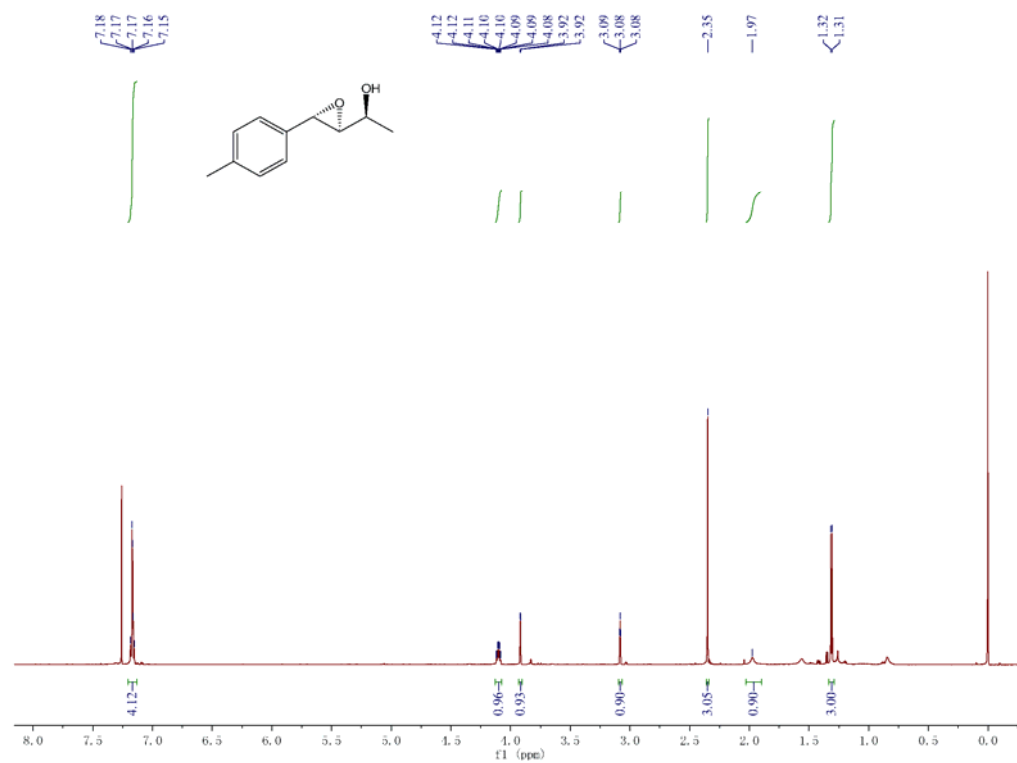

Supplement: c7ob00015d1.pdf [file c7ob00015d1.pdf]
